# Supplementary material for: Necroptosis of macrophage is a key pathological feature in biliary atresia via GDCA/S1PR2/ZBP1/p-MLKL axis
Source: PubMed Central journal article supplement (PMC9977961; doi:10.1038/s41419-023-05615-4), 2023-03-01
Supplement: 41419_2023_5615_MOESM2_ESM.pdf [file 41419_2023_5615_MOESM2_ESM.pdf]

## Necroptosis of macrophage is a key pathological feature in biliary atresia via GDCA/S1PR2/ZBP1/p-MLKL axis

Shen Yang<sup>1,2#</sup>, Na Chang<sup>1#</sup>, Weiyang Li<sup>1#</sup>, Ting Yang<sup>2</sup>, Renmin Xue<sup>1</sup>, Jing Liu<sup>1</sup>, Li Zhang<sup>3</sup>, Xingfeng Yao<sup>4</sup>, Yajun Chen<sup>5</sup>, Huanmin Wang<sup>6</sup>, Lin Yang<sup>1</sup>, Jinshi Huang<sup>2\*</sup>, Liying Li<sup>1\*</sup>

**Supplementary Table 1. The comparison of clinical characteristics between biliary atresia and control groups.**

| Clinical characteristics                      | Biliary atresia (n = 31) | Control (n = 20)      | <i>p</i> value |
|-----------------------------------------------|--------------------------|-----------------------|----------------|
| Boys (n, %)                                   | 16 (51.61)               | 12 (60.00)            | 0.557          |
| Age (months, median, IQR)                     | 2 (1, 3)                 | 21 (12, 33)           | < 0.001        |
| Aspartate aminotransferase (U/L, median, IQR) | 303.50 (215.70, 371.70)  | 85.50 (48.90, 722.20) | < 0.001        |
| Alanine aminotransferase (U/L, median, IQR)   | 207.30 (136.00, 267.40)  | 39.10 (20.50, 263.50) | < 0.001        |
| Total bilirubin (μmol/L, median, IQR)         | 168.70 (140.23, 203.84)  | 8.04 (6.43, 13.55)    | < 0.001        |
| Direct bilirubin (μmol/L, median, IQR)        | 125.75 (92.11, 147.72)   | 2.62 (0.79, 4.46)     | < 0.001        |
| Indirect bilirubin (μmol/L, median, IQR)      | 52.16 (44.22, 87.40)     | 7.15 (5.75, 12.26)    | < 0.001        |
| Total bile acid (μmol/L, median, IQR)         | 138.54 (102.22, 214.20)  | 6.33 (3.52, 7.64)     | < 0.001        |
| γ-GT (U/L, median, IQR)                       | 786.40 (504.00, 1517.10) | 42.60 (32.70, 93.60)  | < 0.001        |

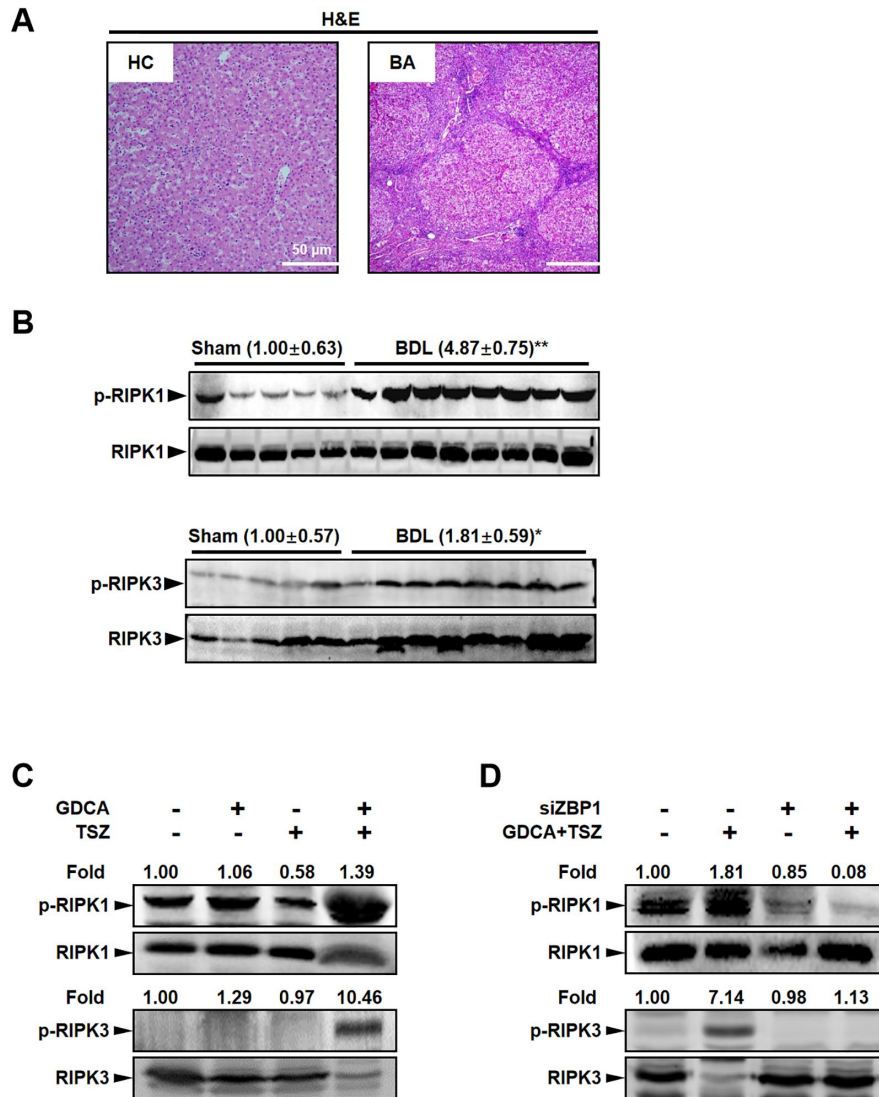

**Supplementary Figure 1. The Pathological changes of BA livers and RIPK1/RIPK3 expressions in BDL or BMDMs.**

**A.** Representative images of H&E staining in normal adjacent non-tumor livers (HC) and biliary atresia (BA) livers. Scale bar: 50  $\mu$ m. **B.** Western blot analysis for p-RIPK1 and p-RIPK3 in the liver tissues from BDL (n=8) and Sham mice (n=5). **C.** Mouse BMDMs were treated with 100  $\mu$ mol/L sodium glycodeoxycholate (GDCA) for 6 hours, with or without treatment of TSZ (TNF $\alpha$  plus Smac mimetic and a pan-caspase inhibitor z-VAD-FMK) for 6 hours. Western blot analysis for p-RIPK1 and p-RIPK3 in mouse BMDMs. **D.** Effects of *Zbp1* siRNA on p-RIPK1 and p-RIPK3 protein expression in mouse BMDMs. Bolts of p-RIPK1 or p-RIPK3 were normalized to RIPK1 or RIPK3, respectively. Data are presented as the mean  $\pm$  SEM. \*  $p$ <0.05, \*\*  $p$ <0.01 (versus control).

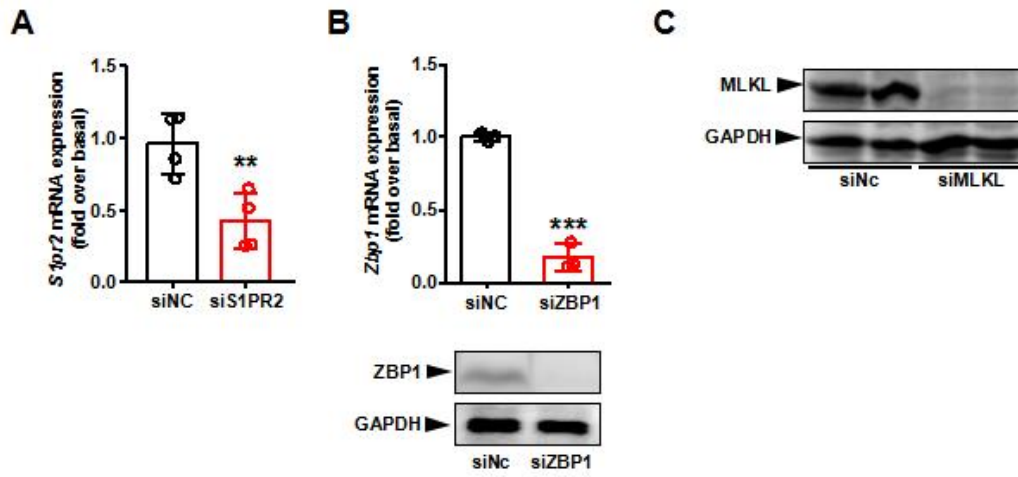

**Supplementary Figure 2. The efficiency of siRNAs in mouse BMDMs**

**A-C.** The efficiency of *Slpr2* (**A**), *Zbp1* (**B**) or MLKL (**C**) knockdown by the siRNA in mouse BMDMs. \*\*  $p < 0.01$ , \*\*\*  $p < 0.001$  (versus control).

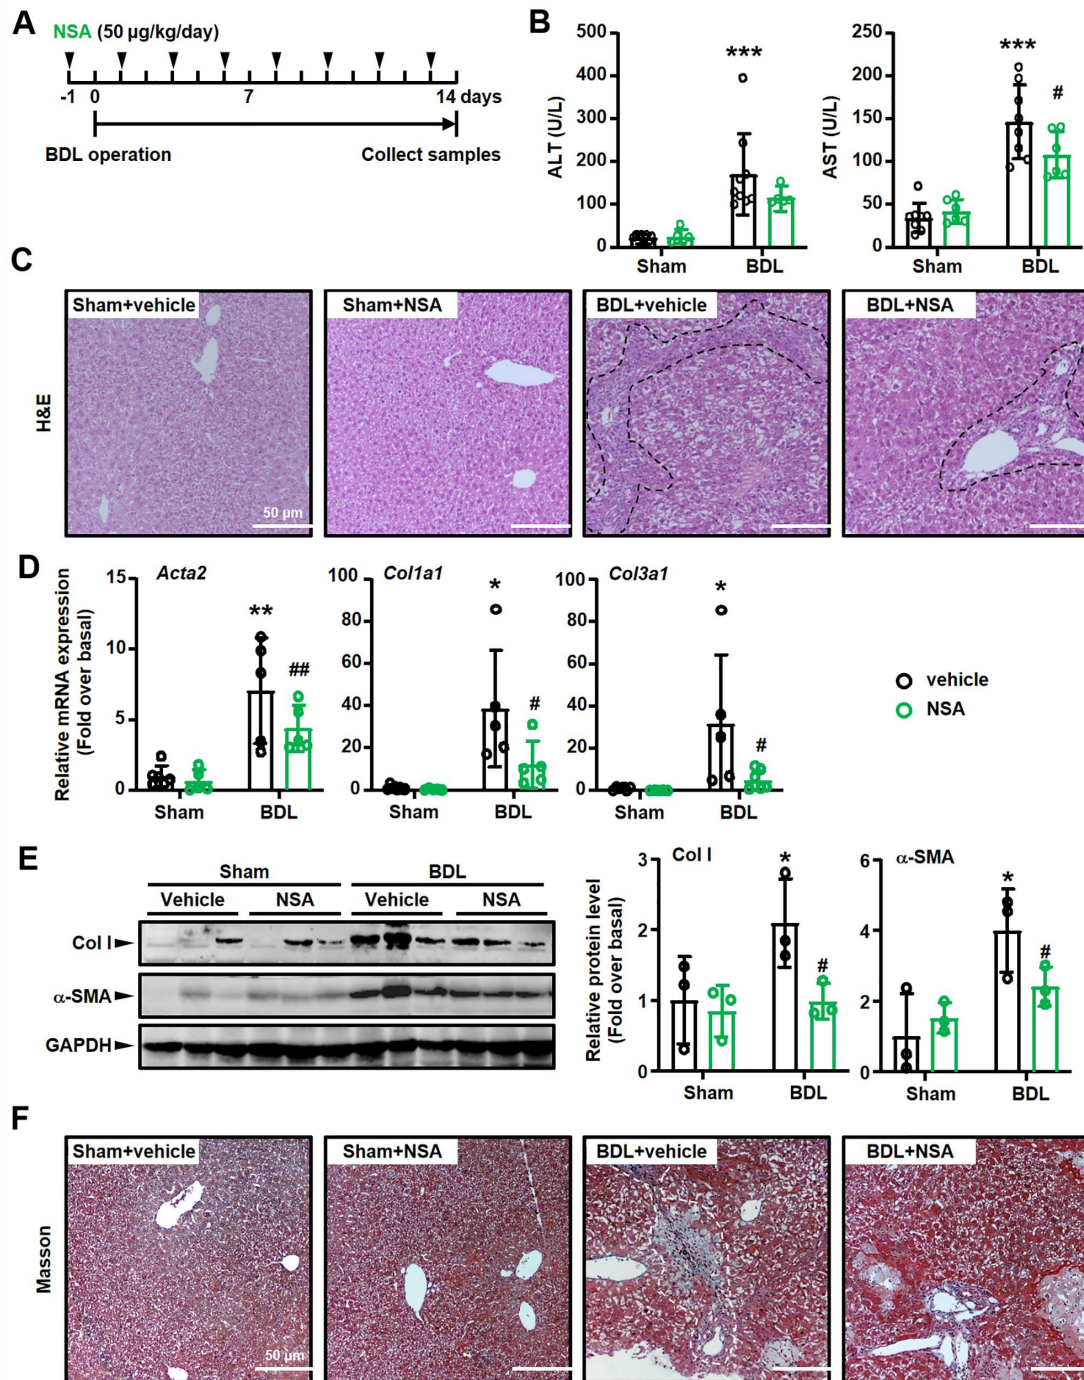

**Supplementary Figure 3. Necroptosis inhibitor (Necrosulfonamide, NSA) alleviates inflammation /fibrosis in BDL liver.**

**A.** The schedule of mouse model. **B.** Serum AST and ALT levels were detected in BDL livers with or without NSA treatment. **C.** Representative images of H&E staining. Black dashed: inflammation area. Scale bars: 50 µm. **D.** mRNA expressions of fibrosis markers (*Acta2*, *Col1a1* and *Col3a1*) were detected by qRT-PCR. **E.** Western blot analysis for Col I and α-SMA in the liver tissues from BDL mouse livers treated with or without NSA. **F.** Representative images of Masson staining. White

dashed: collagen deposition area. Scale bars: 50  $\mu\text{m}$ . Data are presented as the mean  $\pm$  SEM. \*  $p < 0.05$ , \*\*  $p < 0.01$ , \*\*\*  $p < 0.001$  (versus control). #  $p < 0.05$ , ##  $p < 0.01$  (versus BDL alone).
