# Supplementary material for: Necroptosis of macrophage is a key pathological feature in biliary atresia via GDCA/S1PR2/ZBP1/p-MLKL axis
Source: PubMed Central journal article supplement (PMC9977961; doi:10.1038/s41419-023-05615-4), 2023-03-01
Supplement: 41419_2023_5615_MOESM3_ESM.pdf [file 41419_2023_5615_MOESM3_ESM.pdf]

Fig. 1C

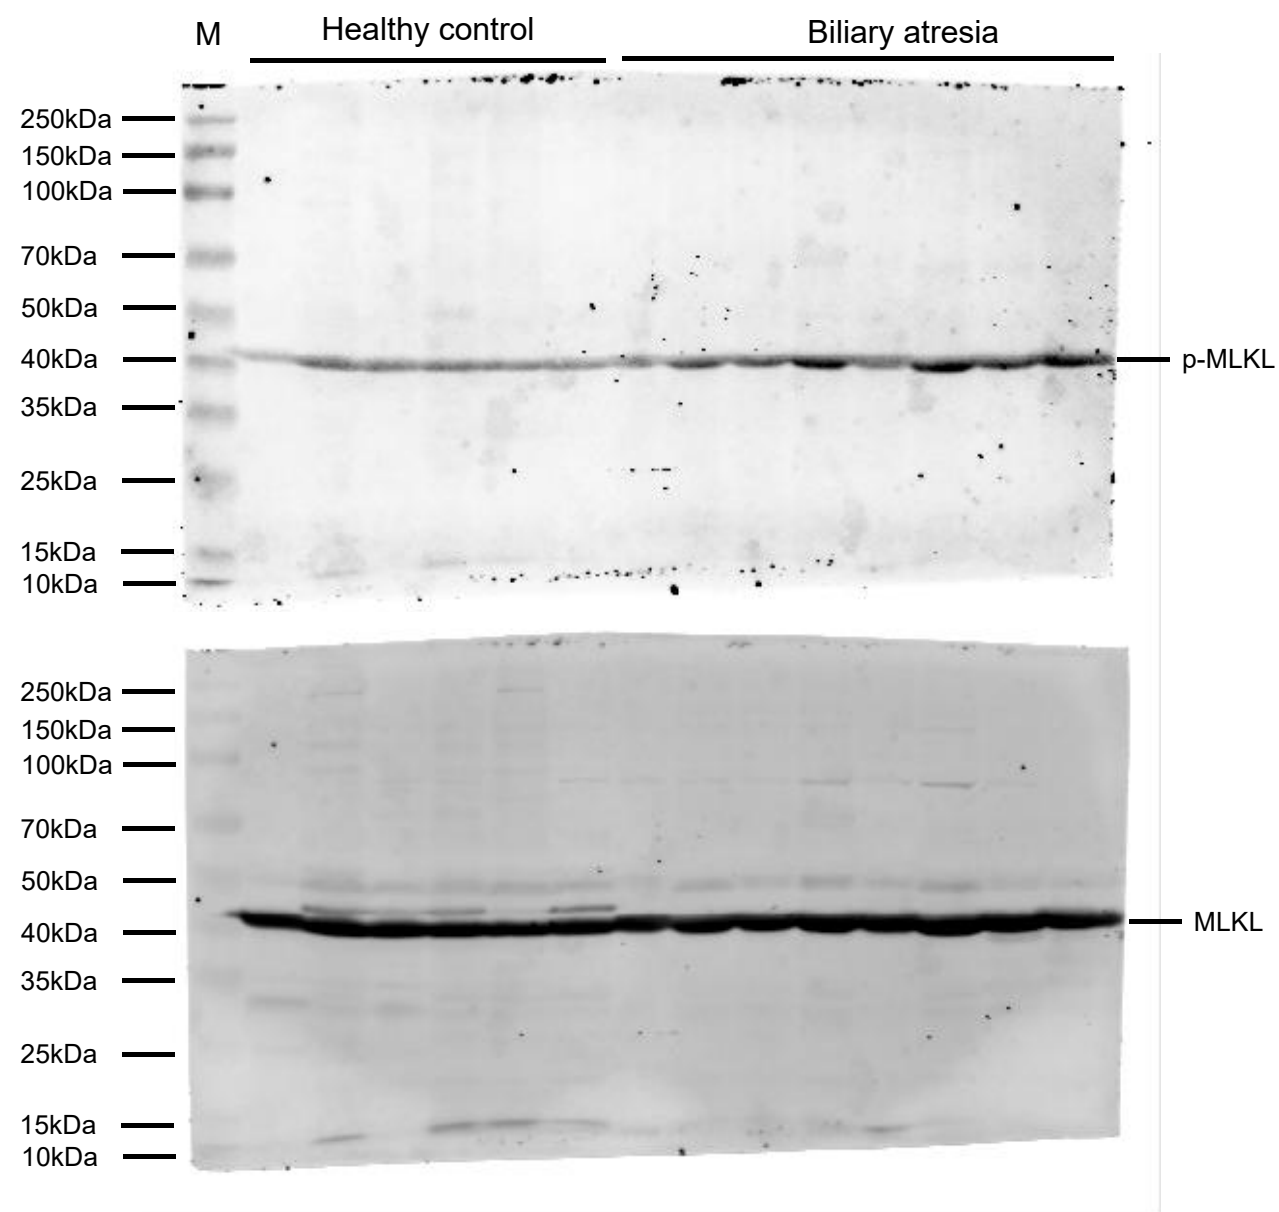

Fig. 1C

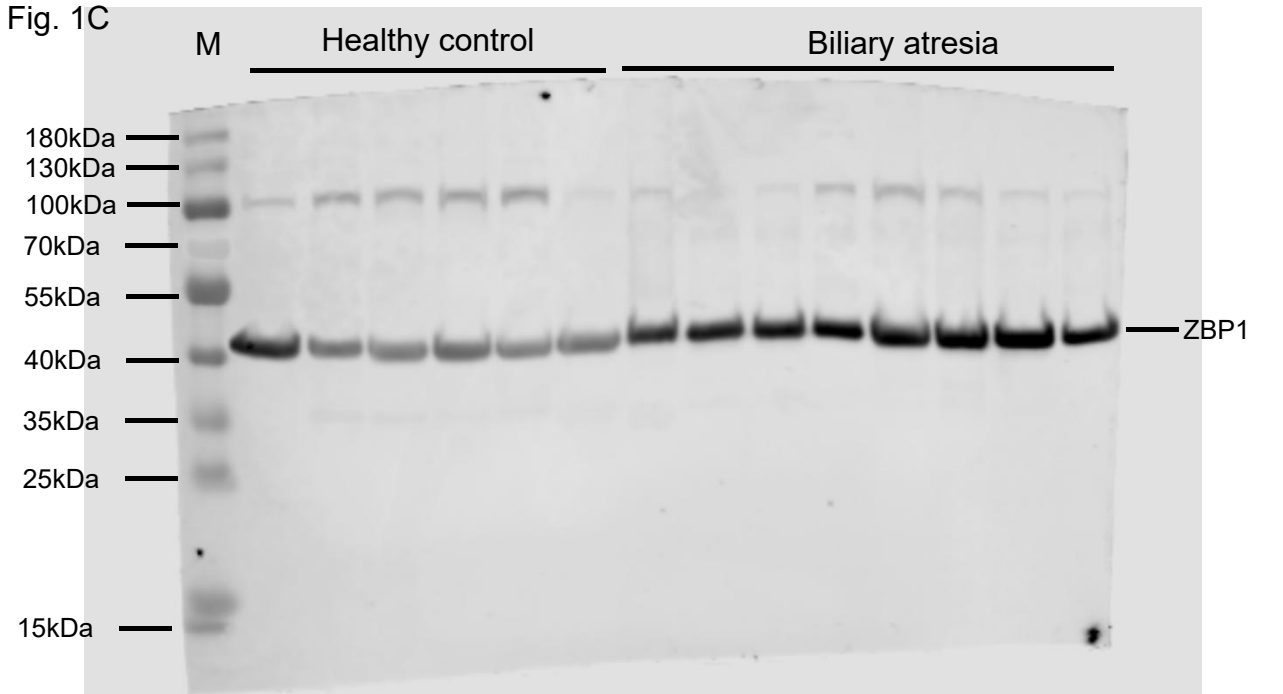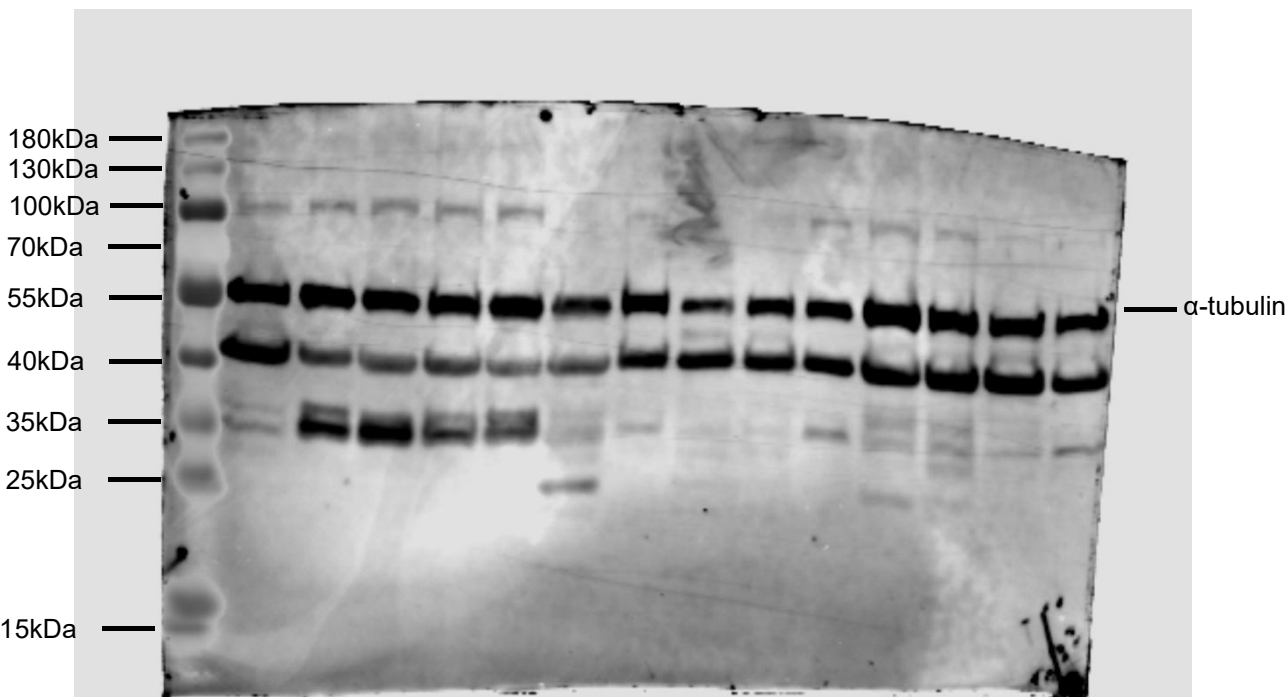



Fig. 3C

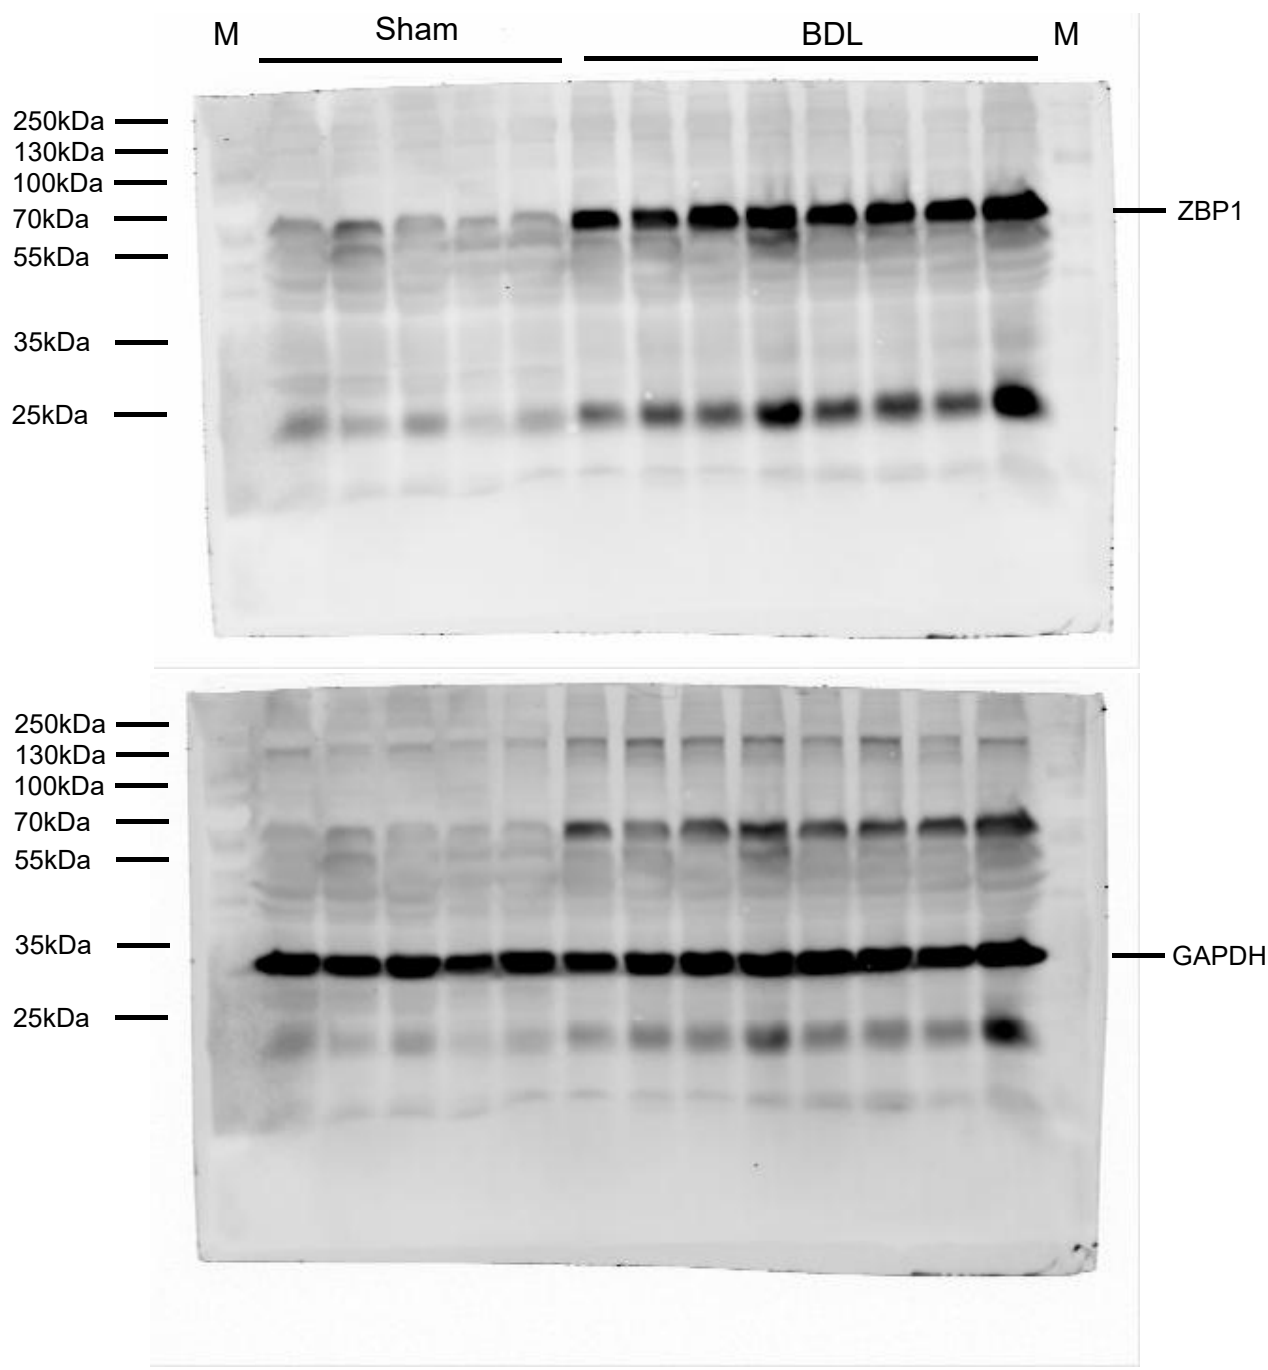

Fig. 6B

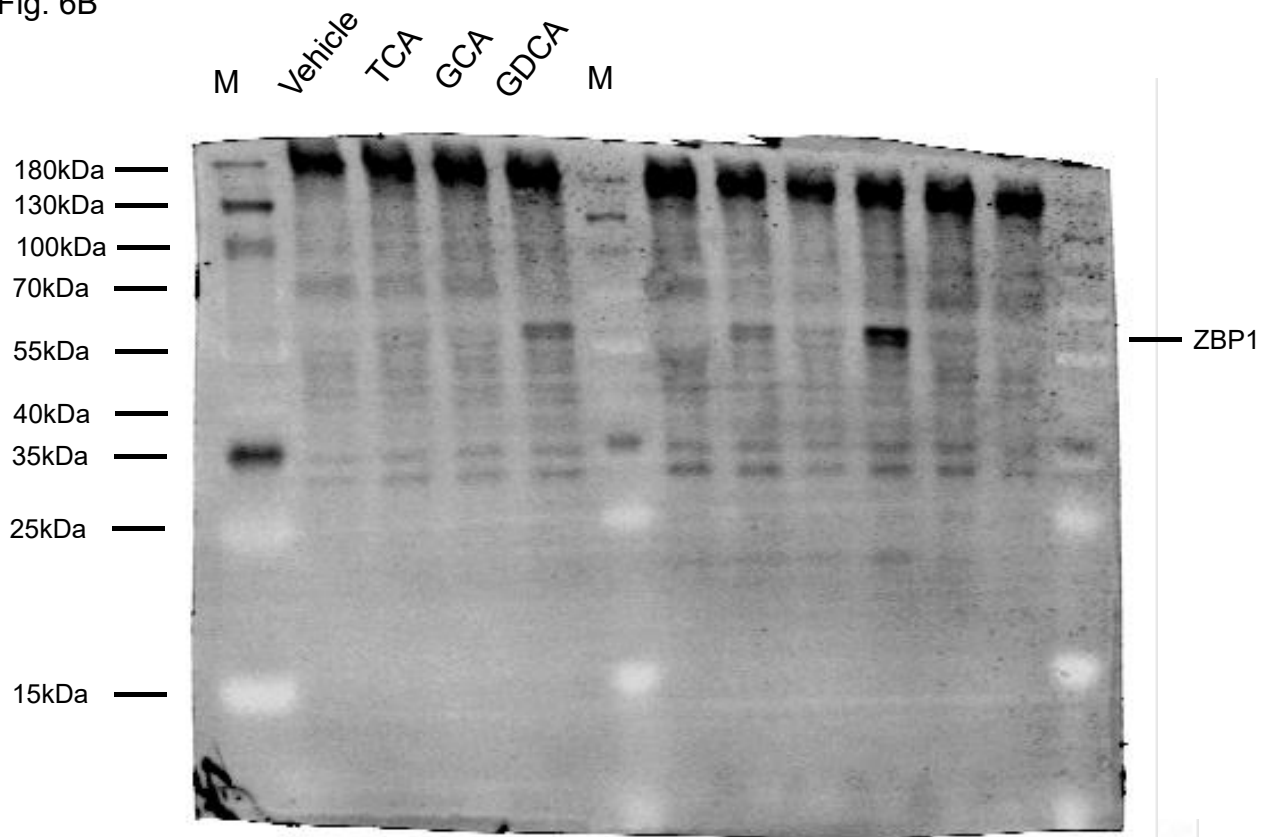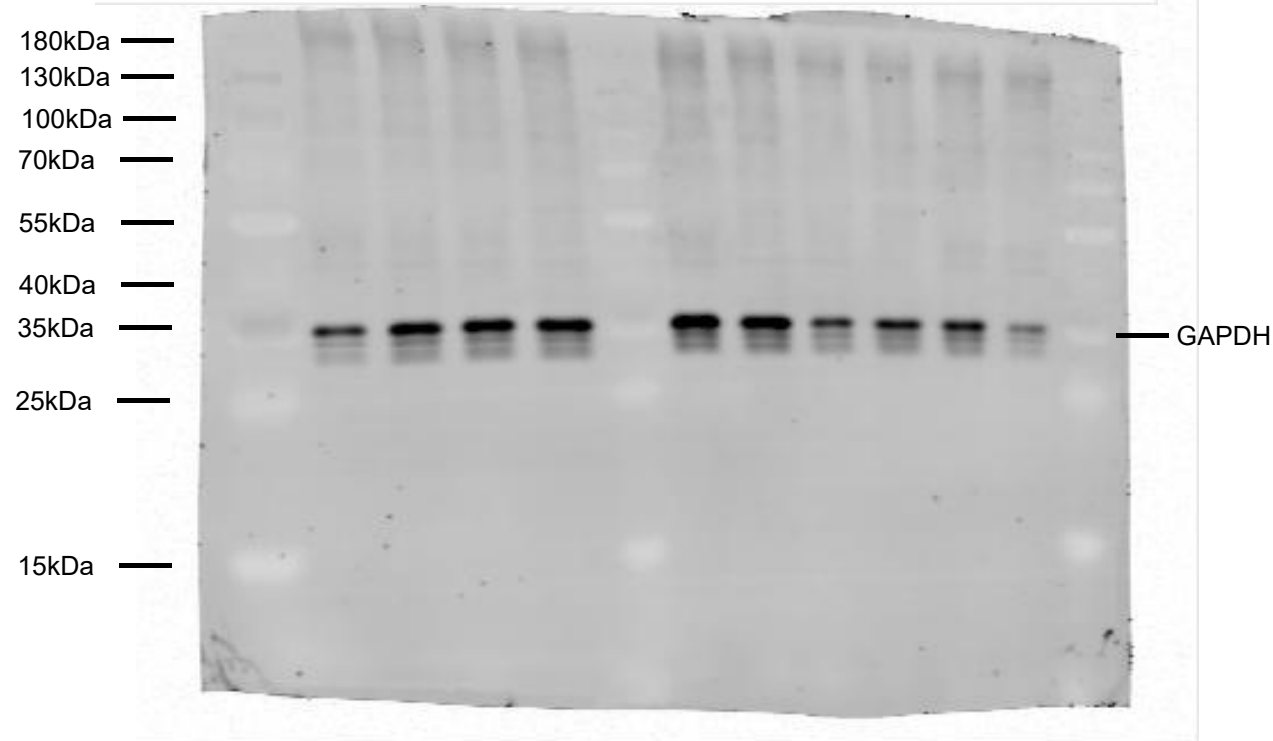

Fig. 6E

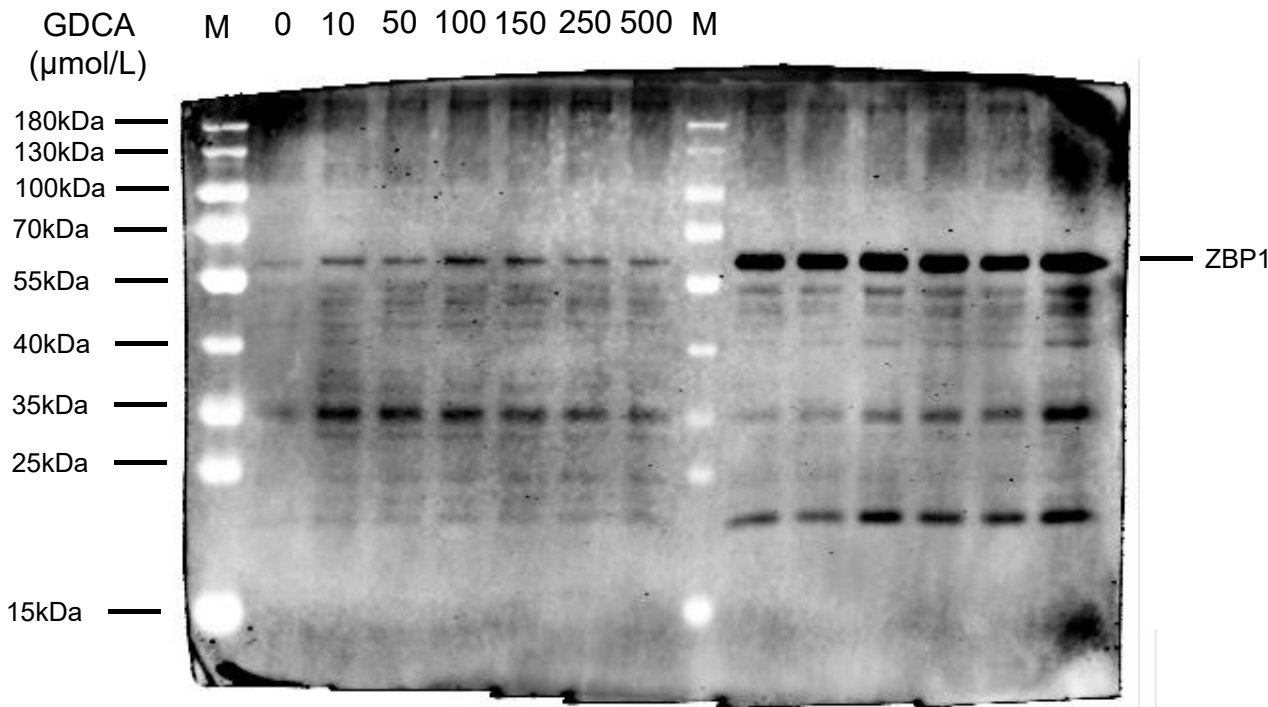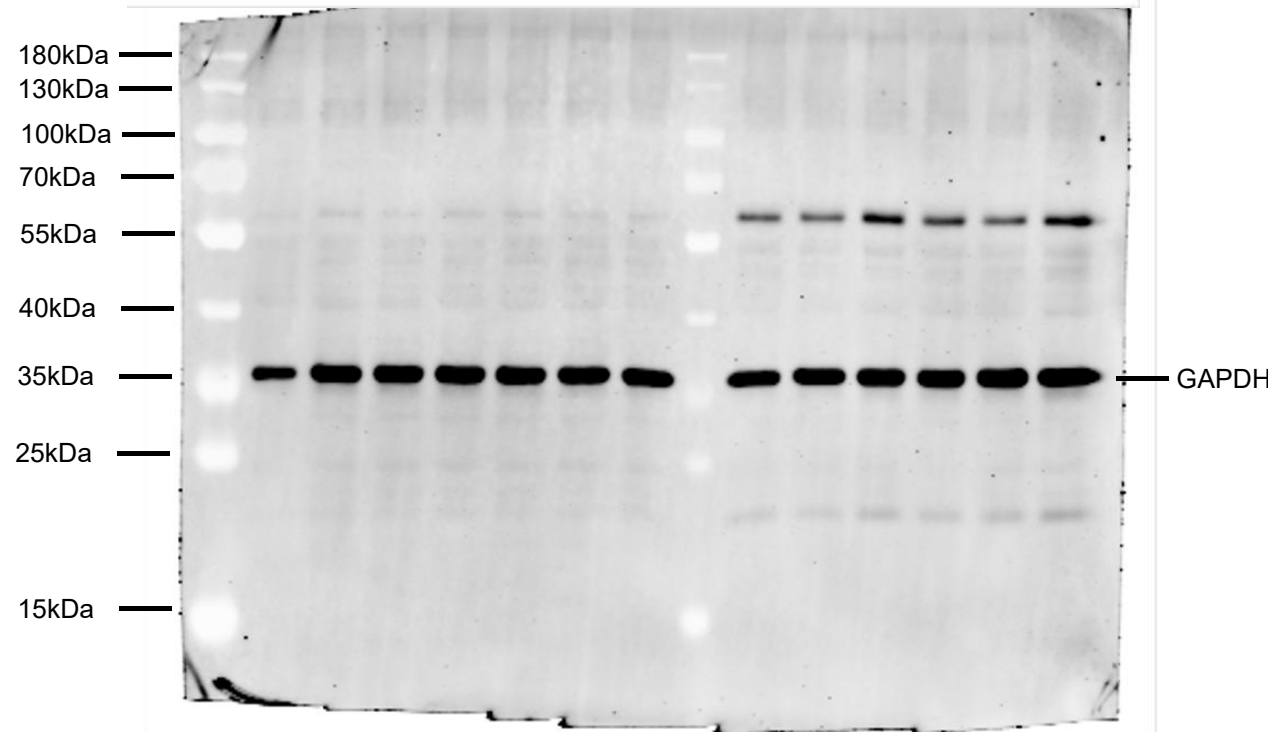

Fig. 6F

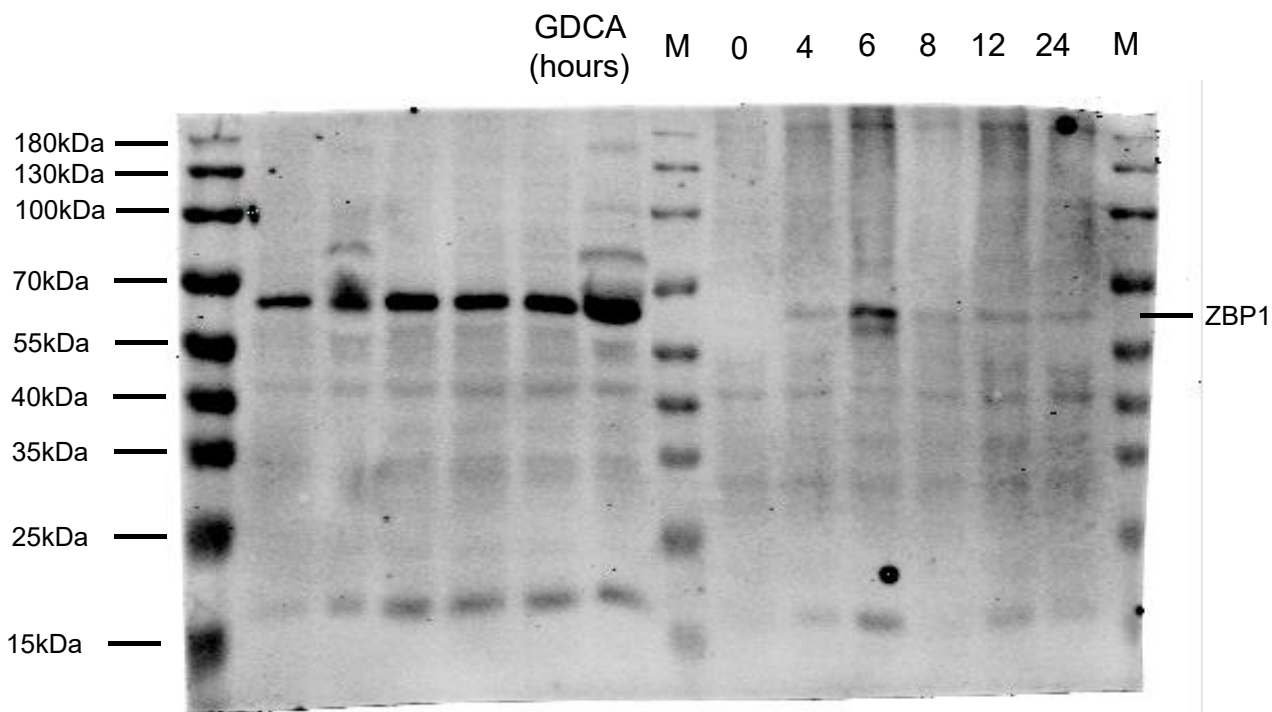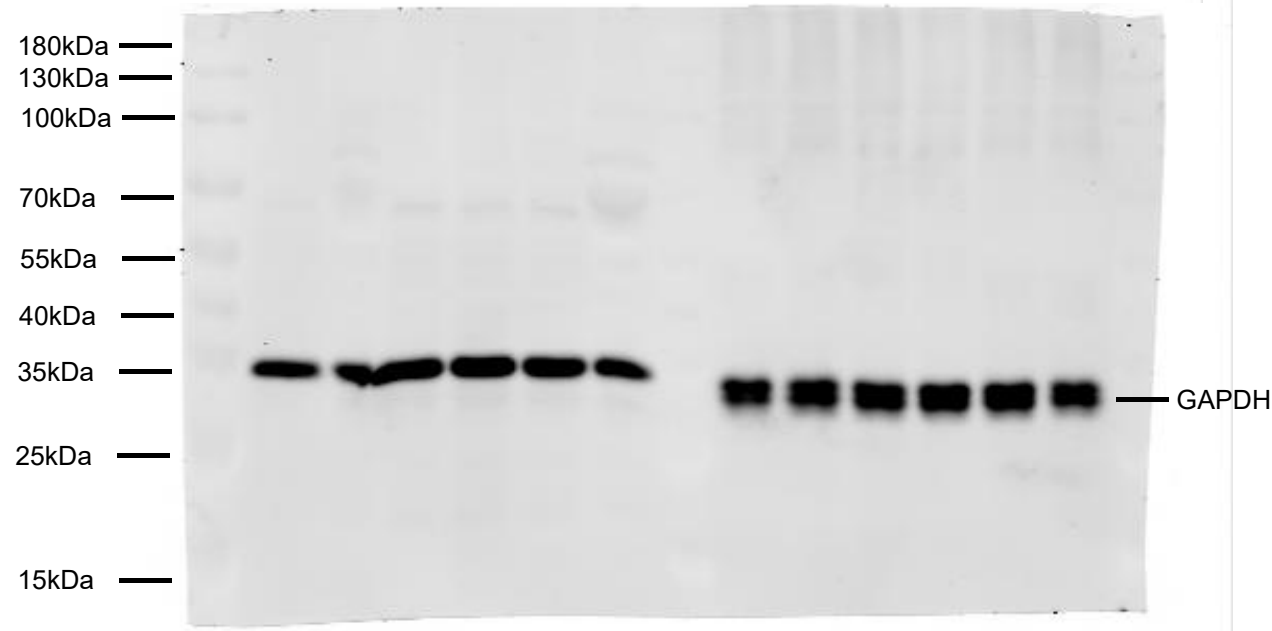

Fig. 7G

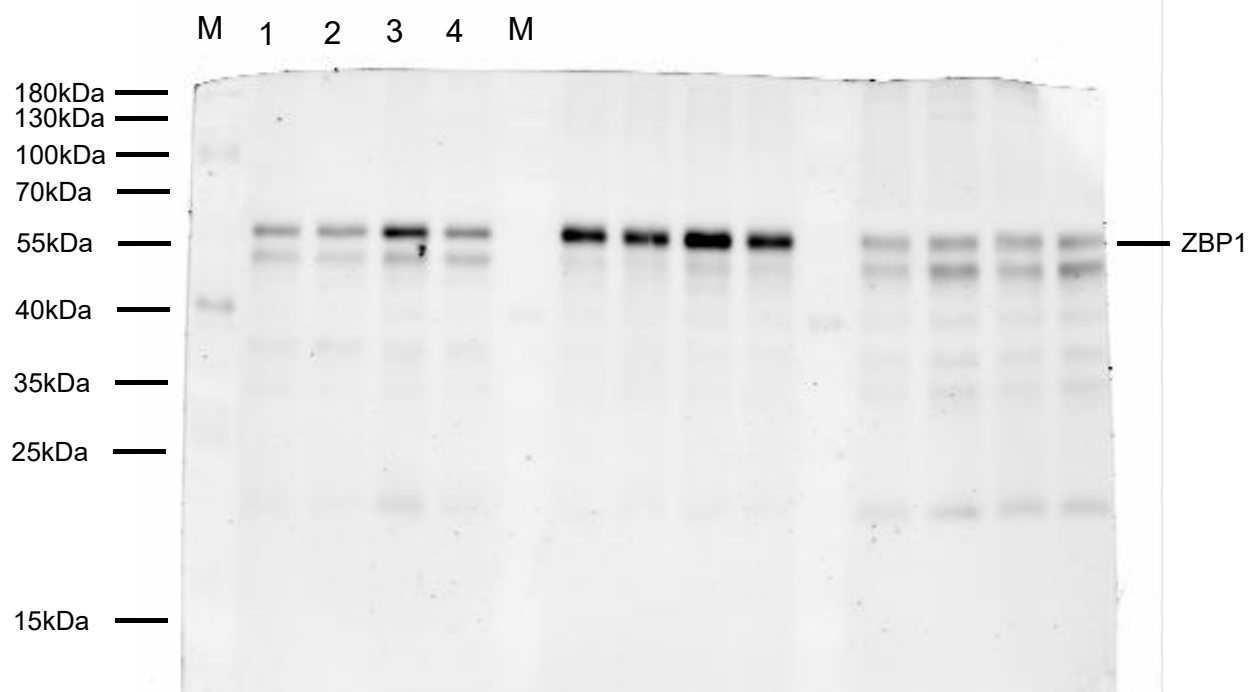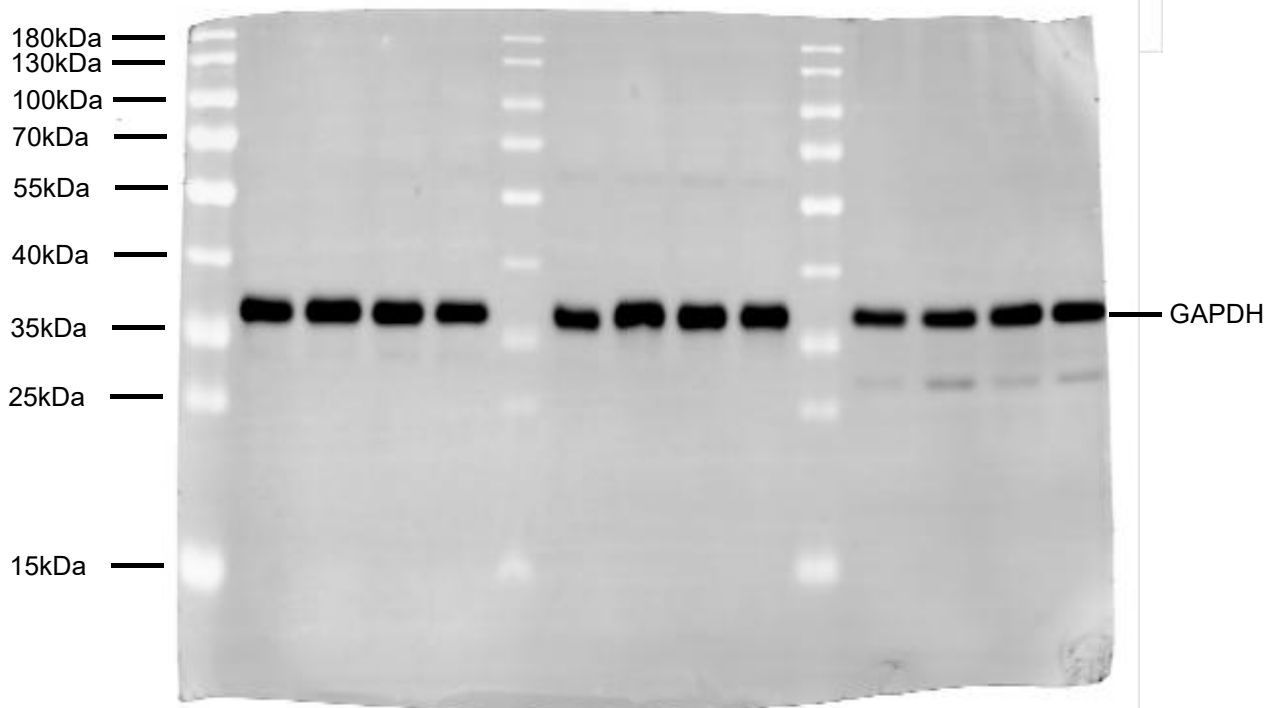

- 1: Control-treated BMDMs
- 2: 10  $\mu\text{mol/L}$  JTE-013-treated BMDMs
- 3: 100  $\mu\text{mol/L}$  GDCA-treated BMDMs
- 4: 10  $\mu\text{mol/L}$  JTE-013 and 100  $\mu\text{mol/L}$  GDCA-treated BMDMs



Fig. 7H

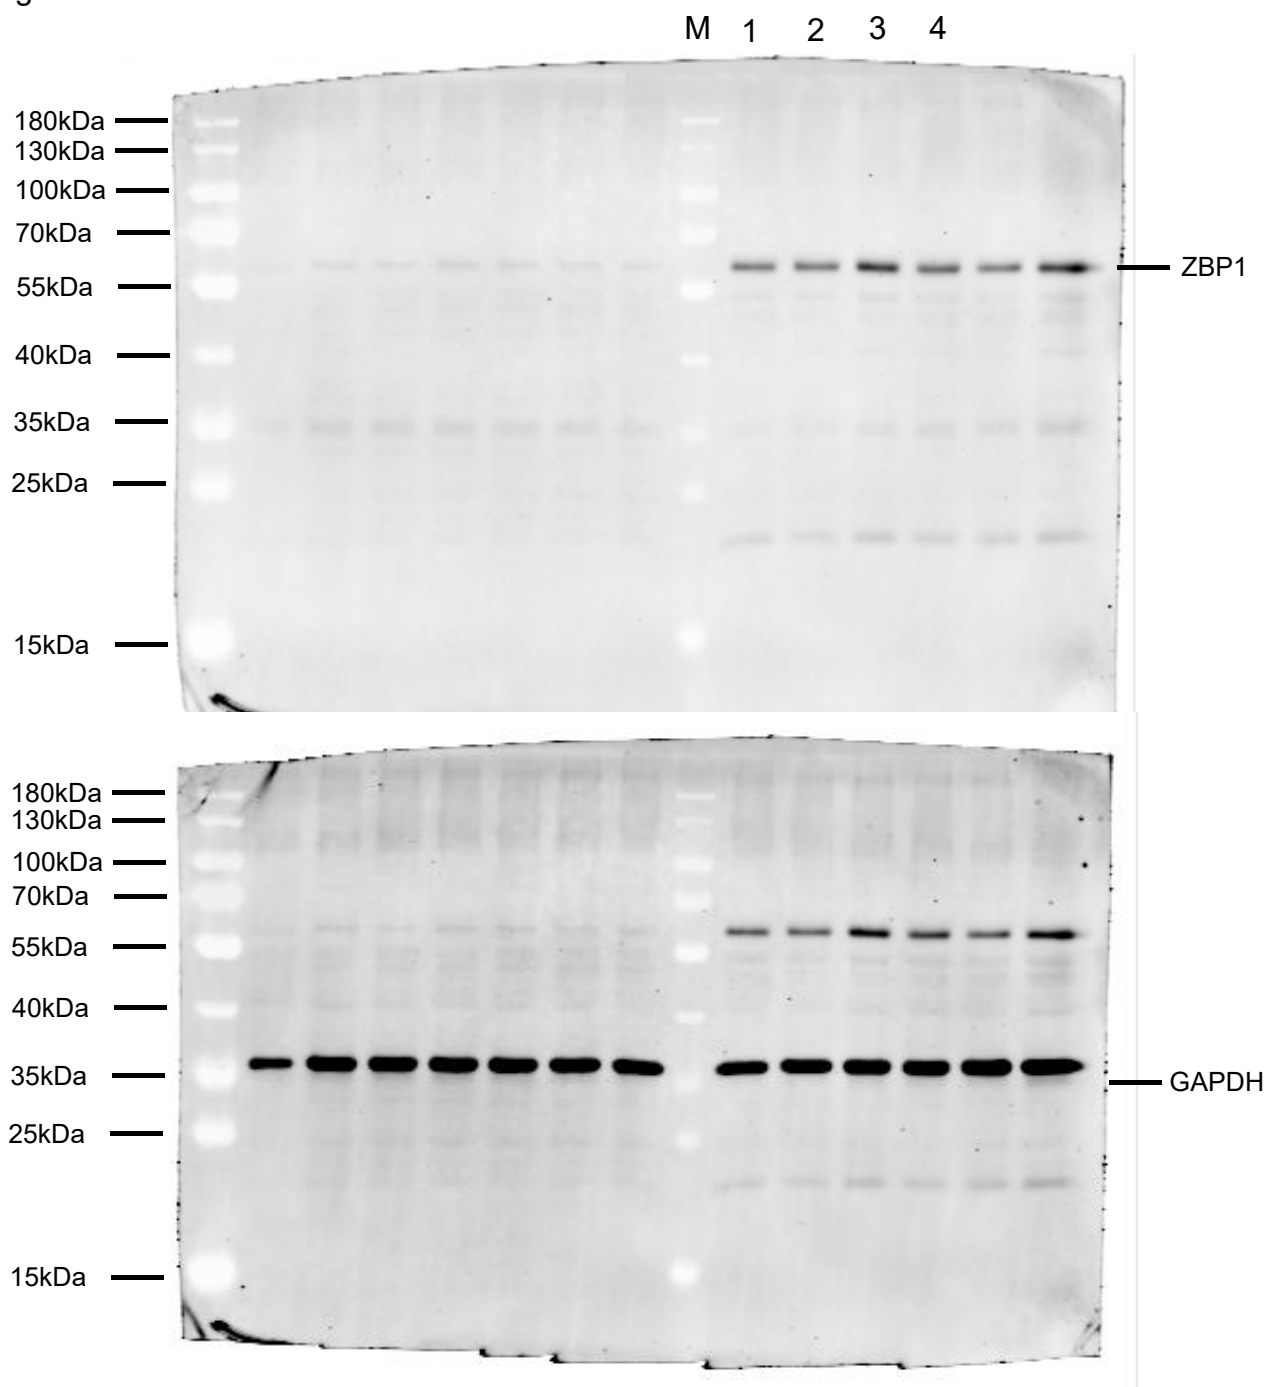

- 1: siNC-treated BMDMs
- 2: siS1PR2-treated BMDMs
- 3: siNC and 100  $\mu\text{mol/L}$  GDCA-treated BMDMs
- 4: siS1PR2 and 100  $\mu\text{mol/L}$  GDCA-treated BMDMs

Fig. 8A

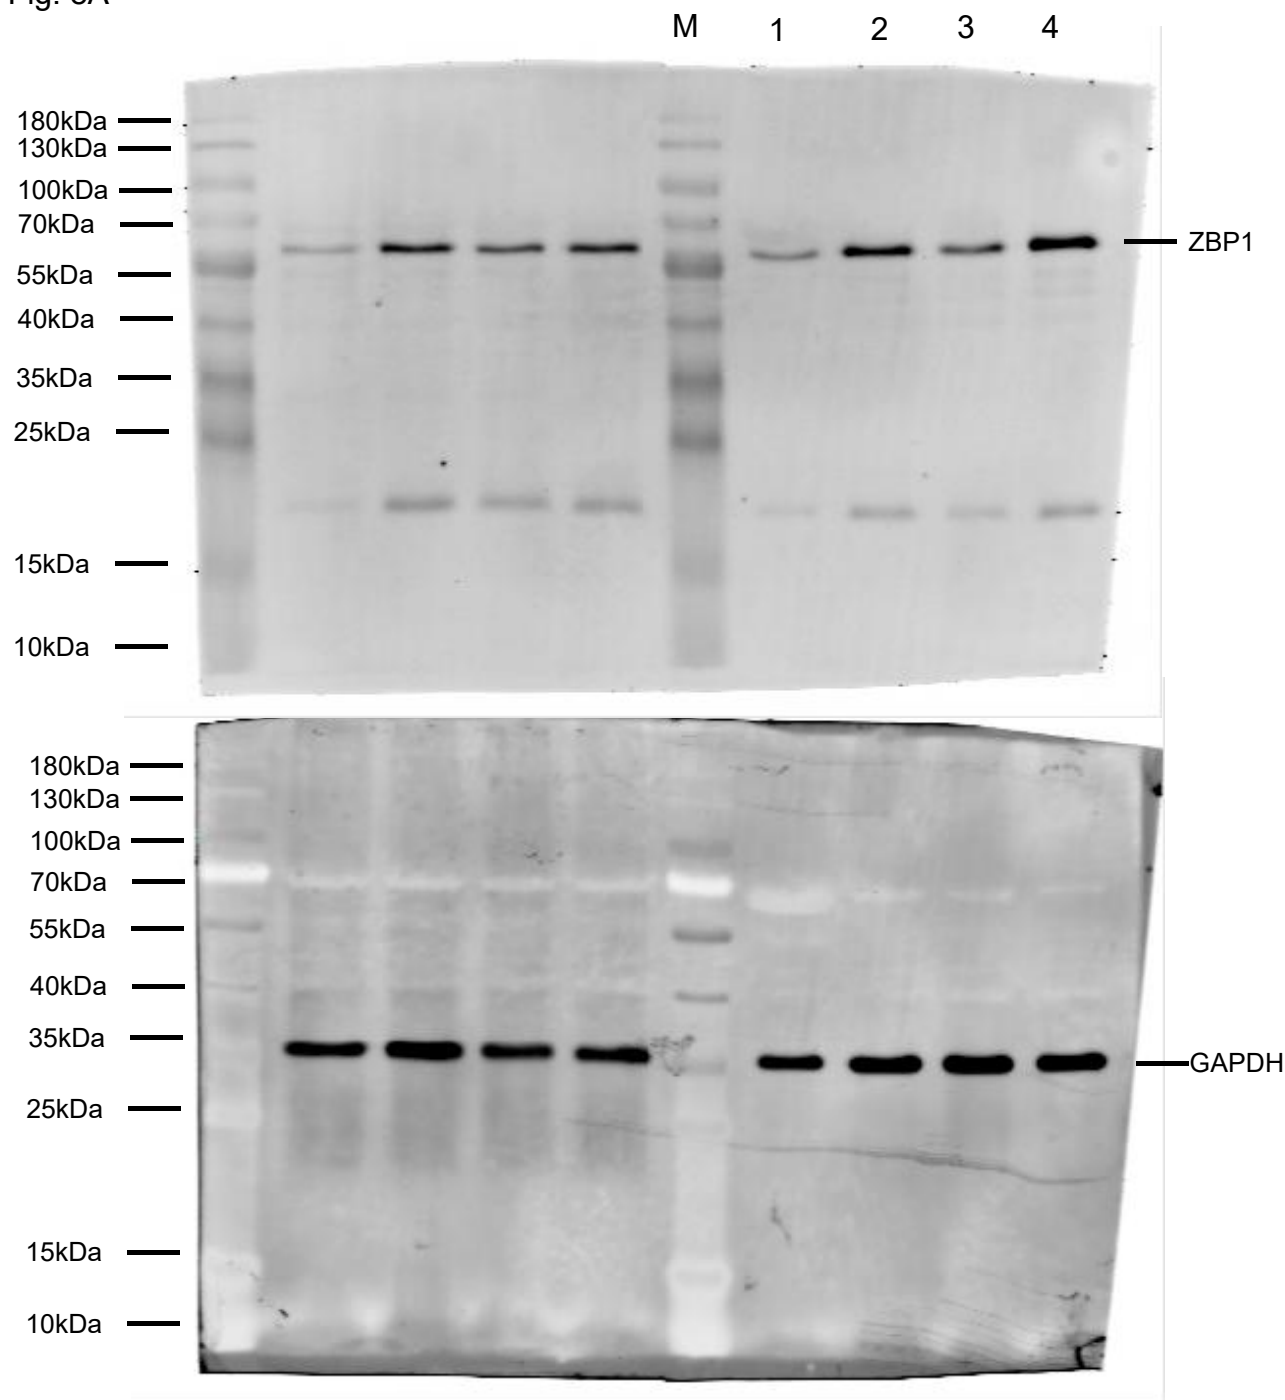

- 1: Control-treated BMDMs
- 2: 100  $\mu\text{mol/L}$  GDCA-treated BMDMs
- 3: TSZ-treated BMDMs
- 4: TSZ and 100  $\mu\text{mol/L}$  GDCA-treated BMDMs

Fig. 8A

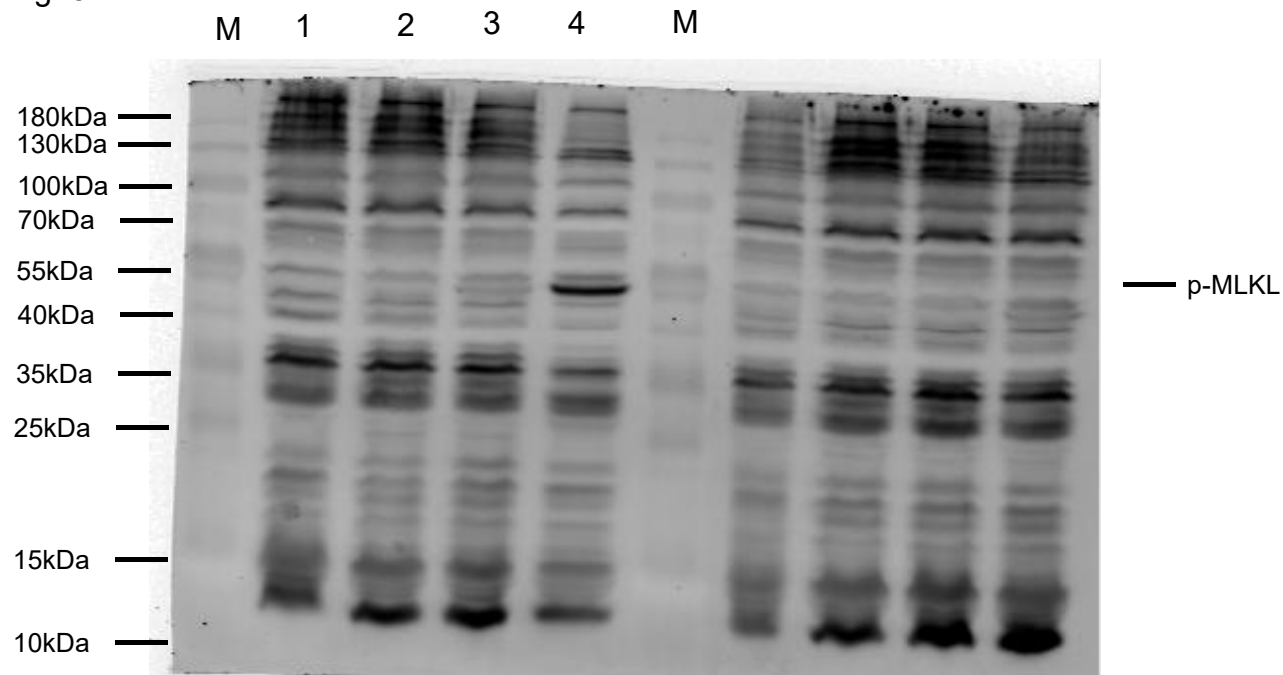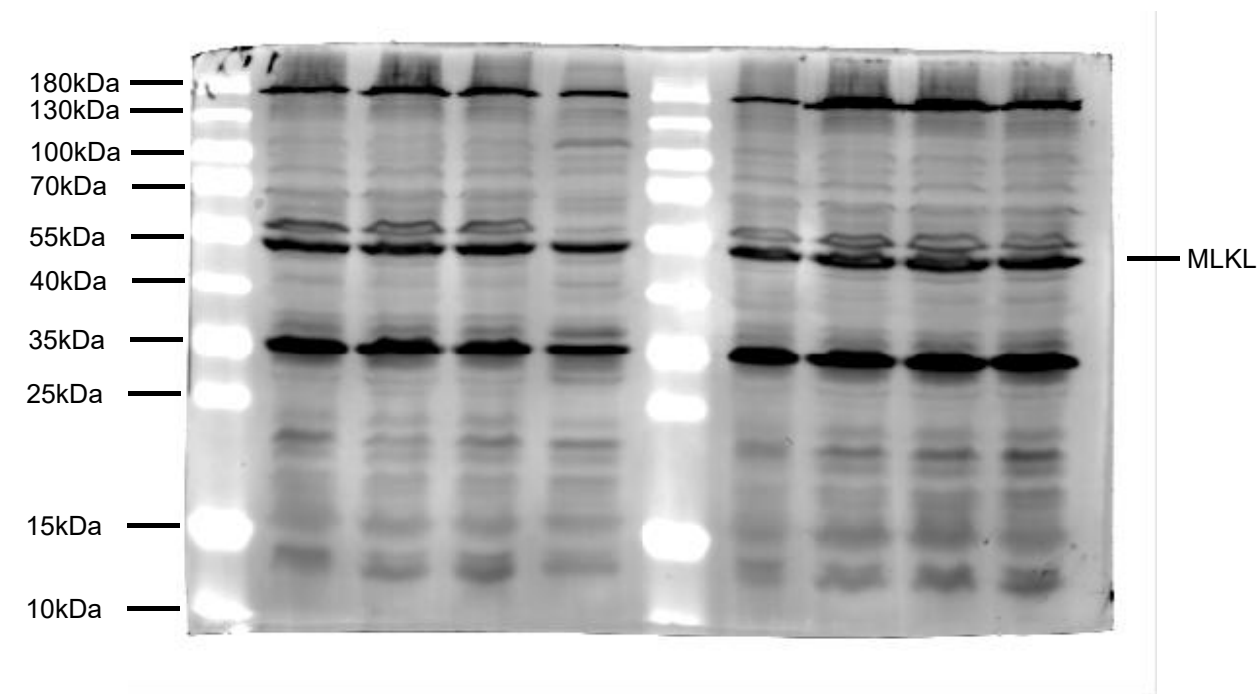

- 1: Control-treated BMDMs
- 2: 100  $\mu\text{mol/L}$  GDCA-treated BMDMs
- 3: TSZ-treated BMDMs
- 4: TSZ and 100  $\mu\text{mol/L}$  GDCA-treated BMDMs

Fig. 8C

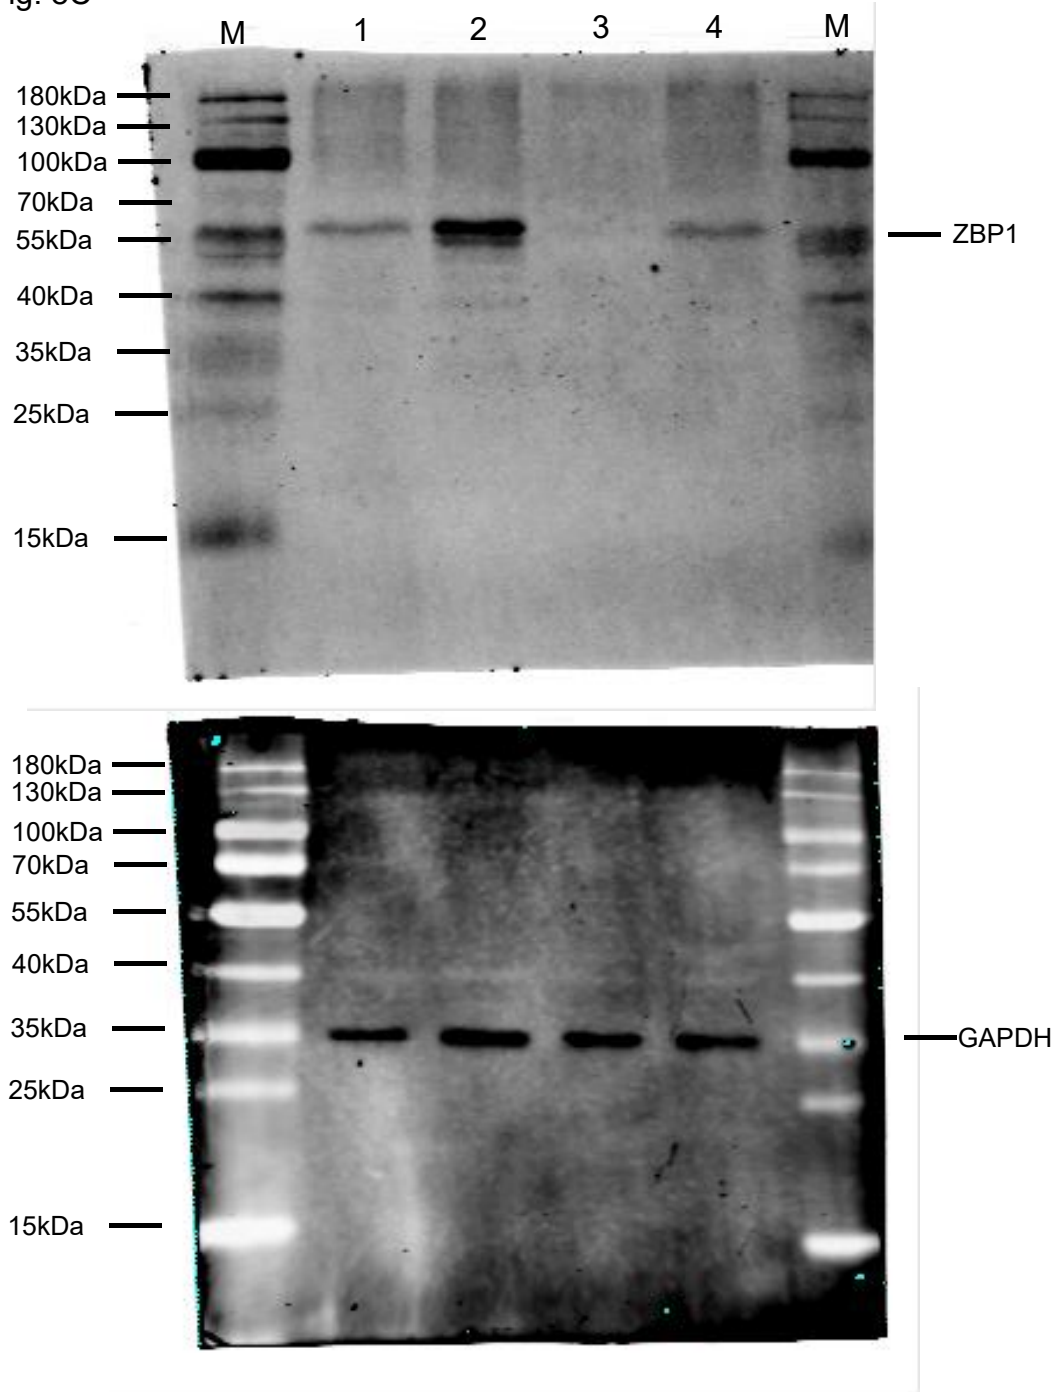

- 1: siNC-treated BMDMs
- 2: siNC, TSZ, and 100  $\mu\text{mol/L}$  GDCA-treated BMDMs
- 3: siZBP1-treated BMDMs
- 4: siZBP1, TSZ, and 100  $\mu\text{mol/L}$  GDCA-treated BMDMs

Fig. 8C

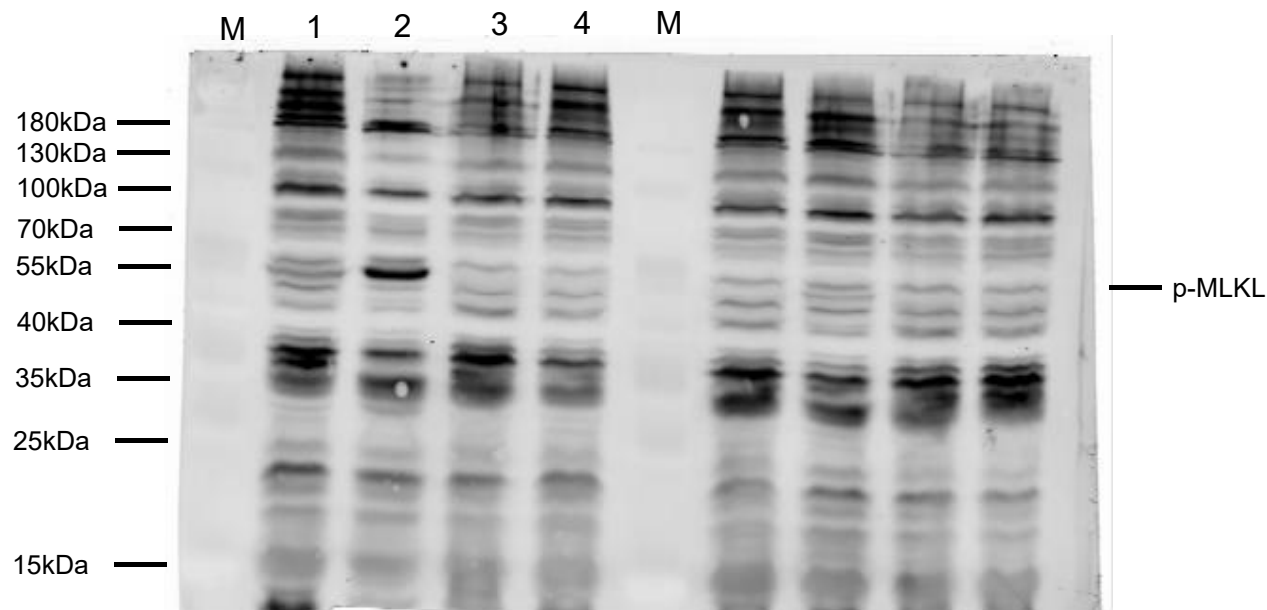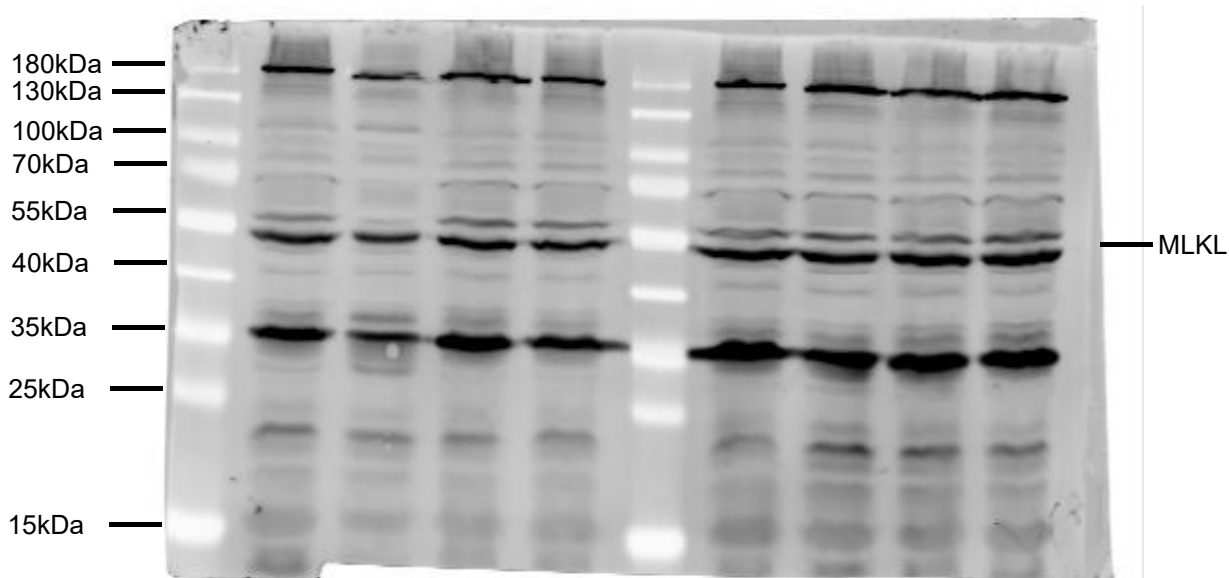

- 1: siNC-treated BMDMs
- 2: siNC, TSZ, and 100  $\mu$ mol/L GDCA-treated BMDMs
- 3: siZBP1-treated BMDMs
- 4: siZBP1, TSZ, and 100  $\mu$ mol/L GDCA-treated BMDMs

Fig. 8H

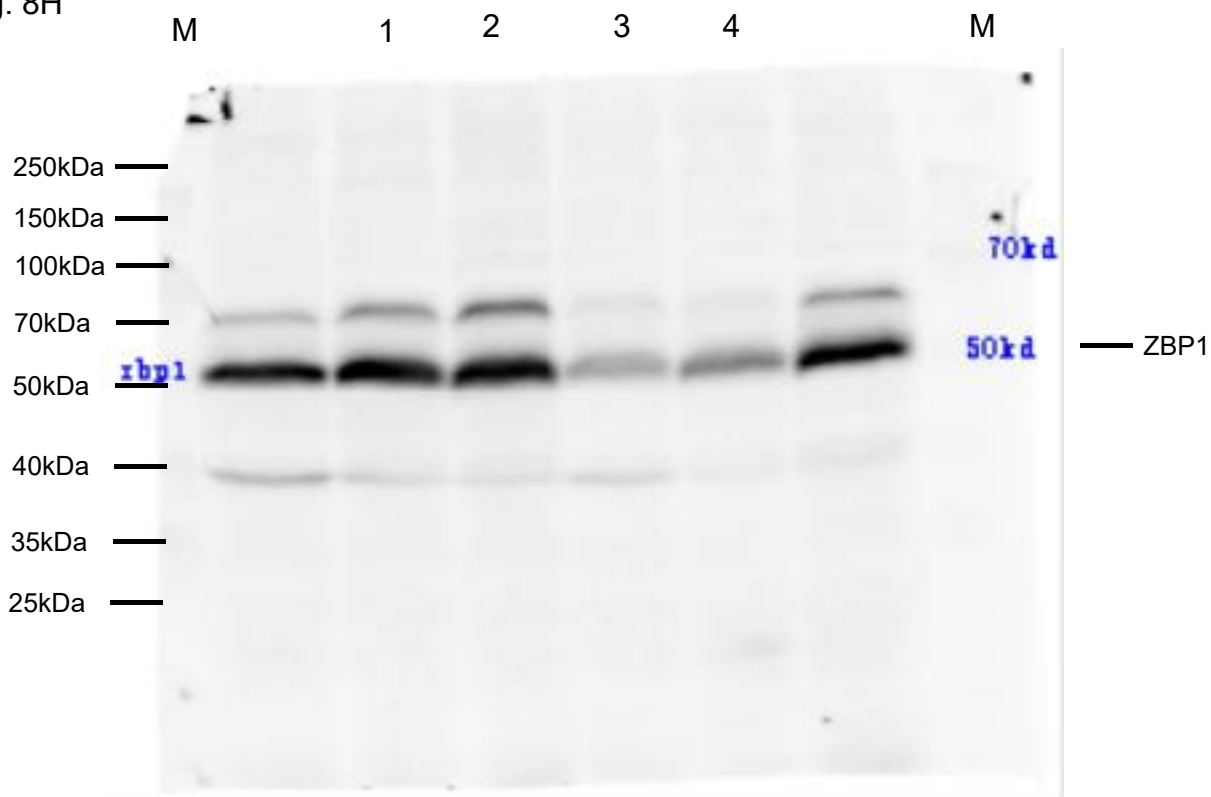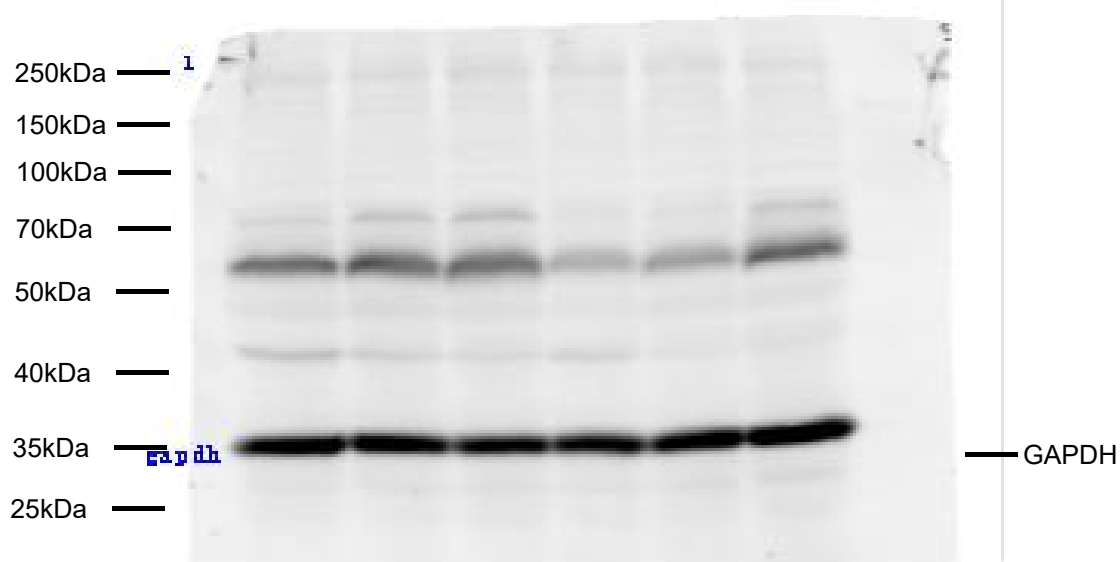

1、2: siNC-treated  
3、4: siS1PR2-treated

Fig. 8H

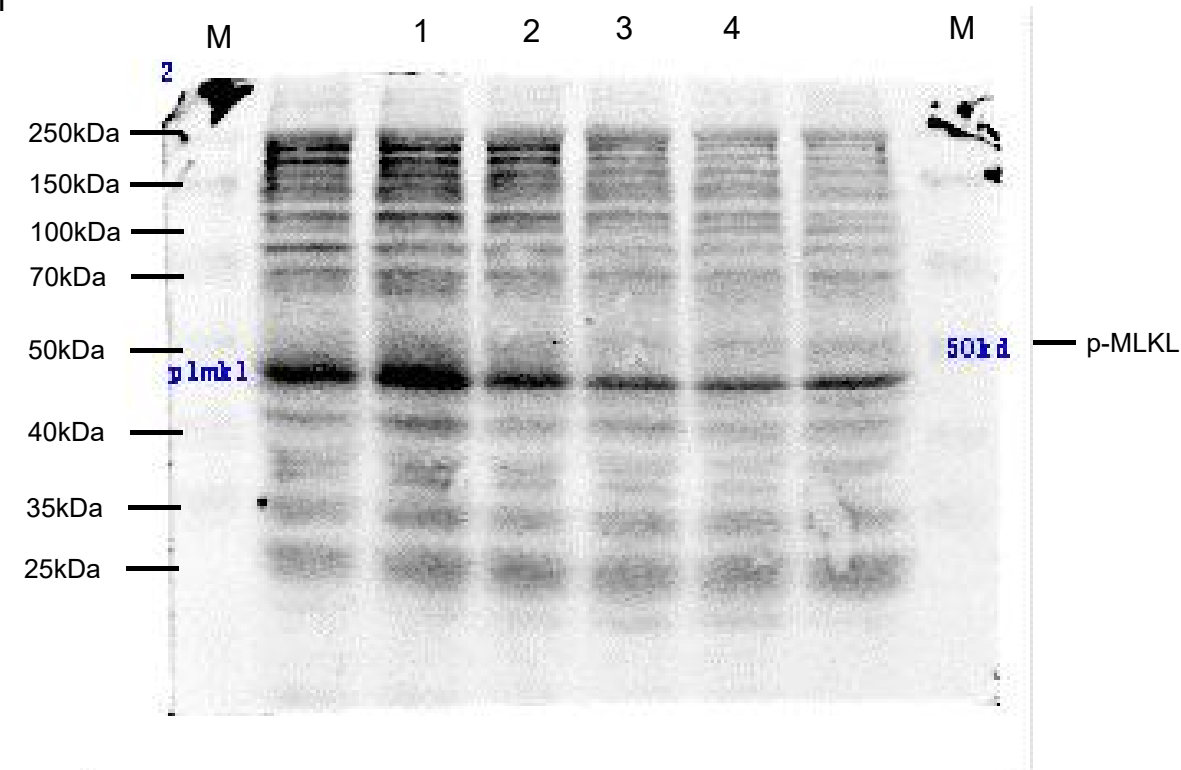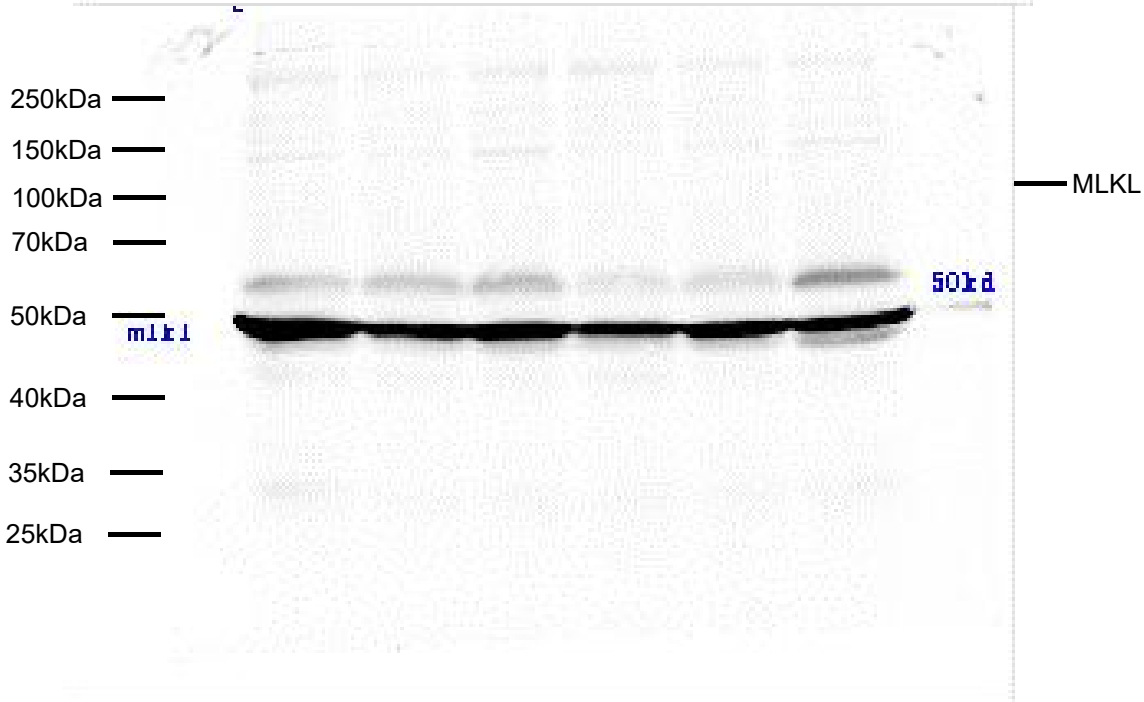

1、 2: siNC-treated  
3、 4: siS1PR2-treated

Fig. 8H

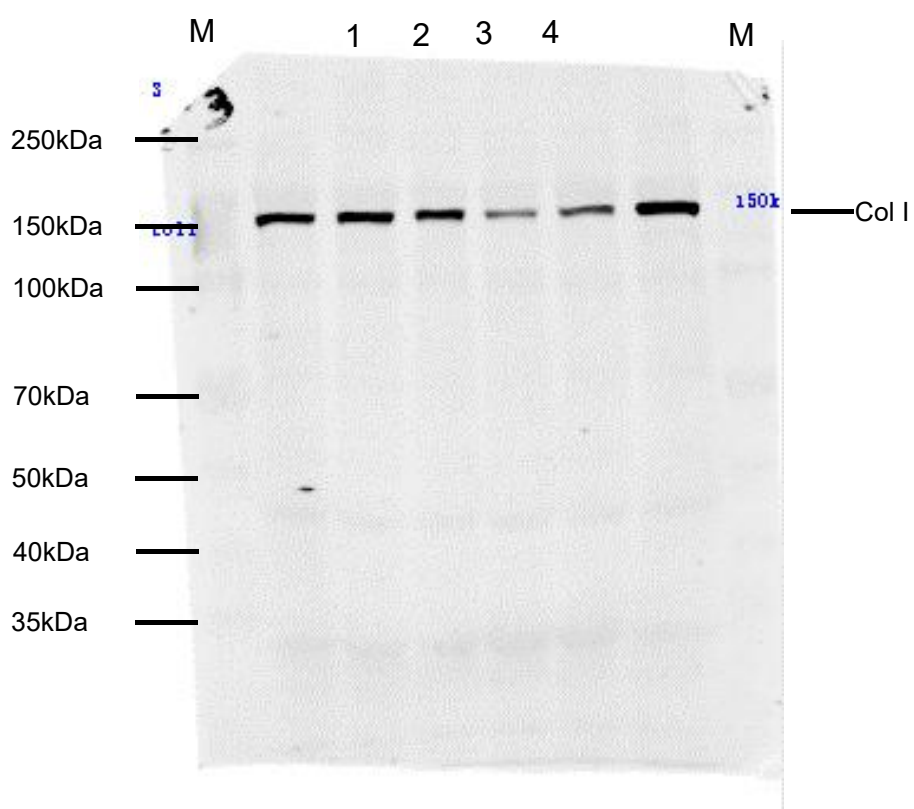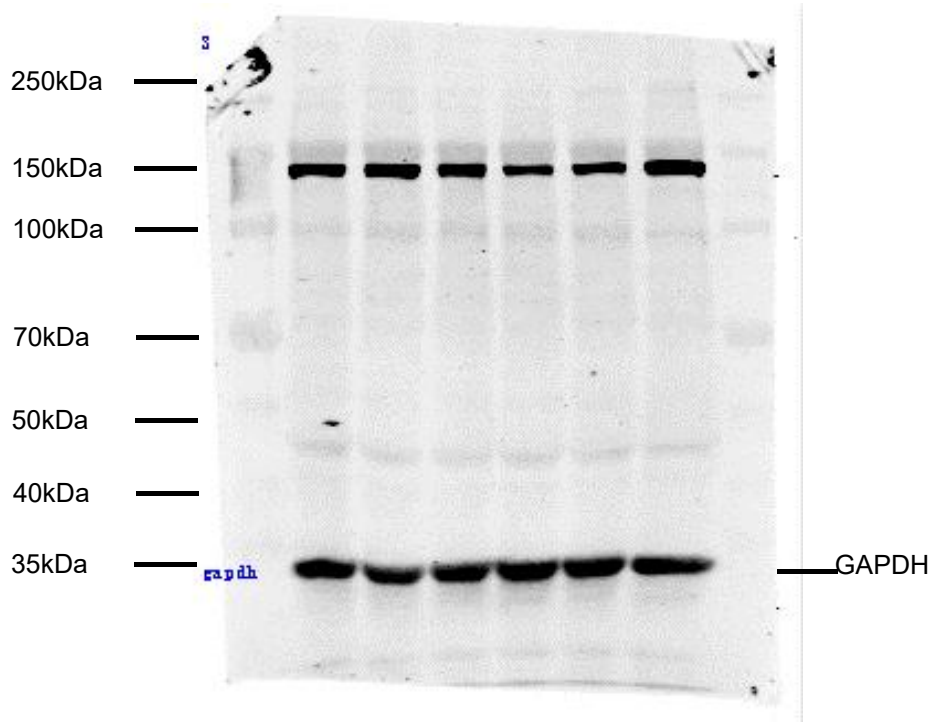

1、2: siNC-treated  
3、4: siS1PR2-treated



**Fig. 9F**

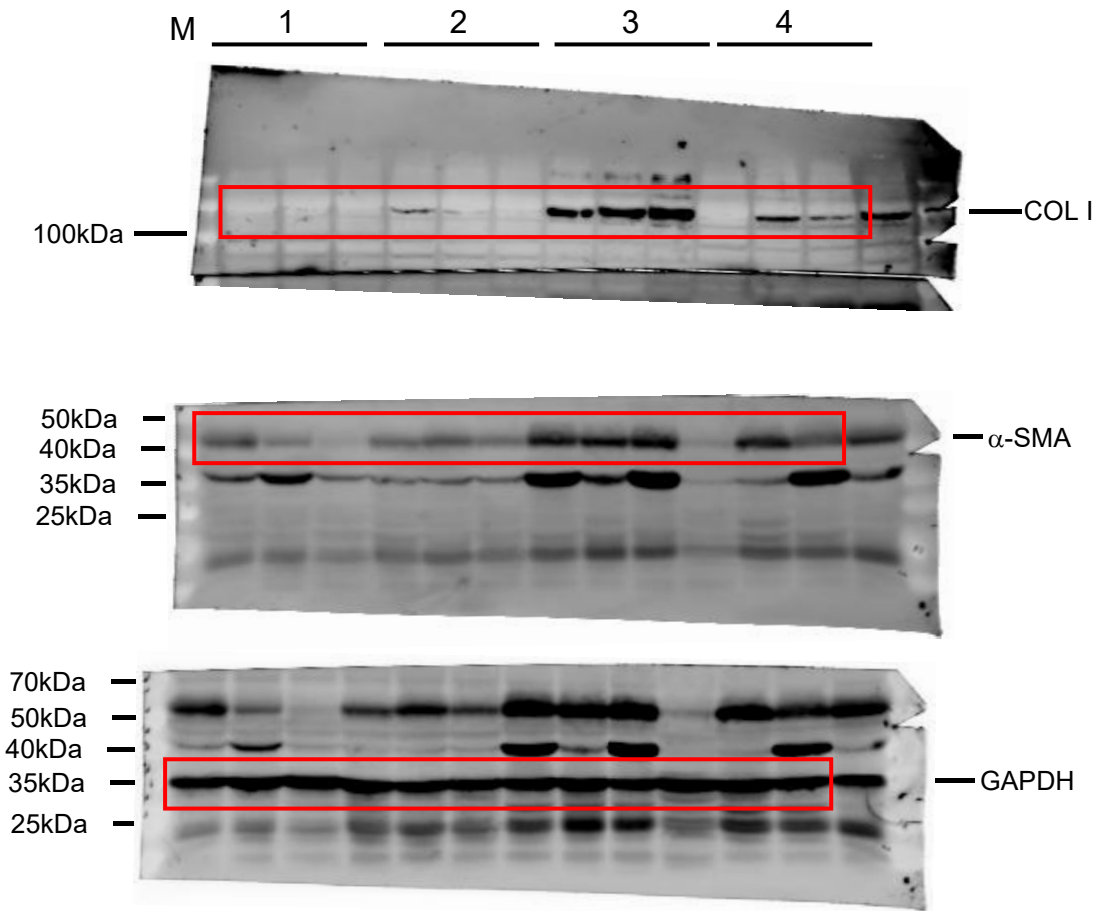

- 1: Sham + Nc siRNA-GeRPs
- 2: Sham + *Zbp1* siRNA-GeRPs
- 3: BDL+ Nc siRNA-GeRPs
- 4: BDL + *Zbp1* siRNA-GeRPs

**Fig. 10F**

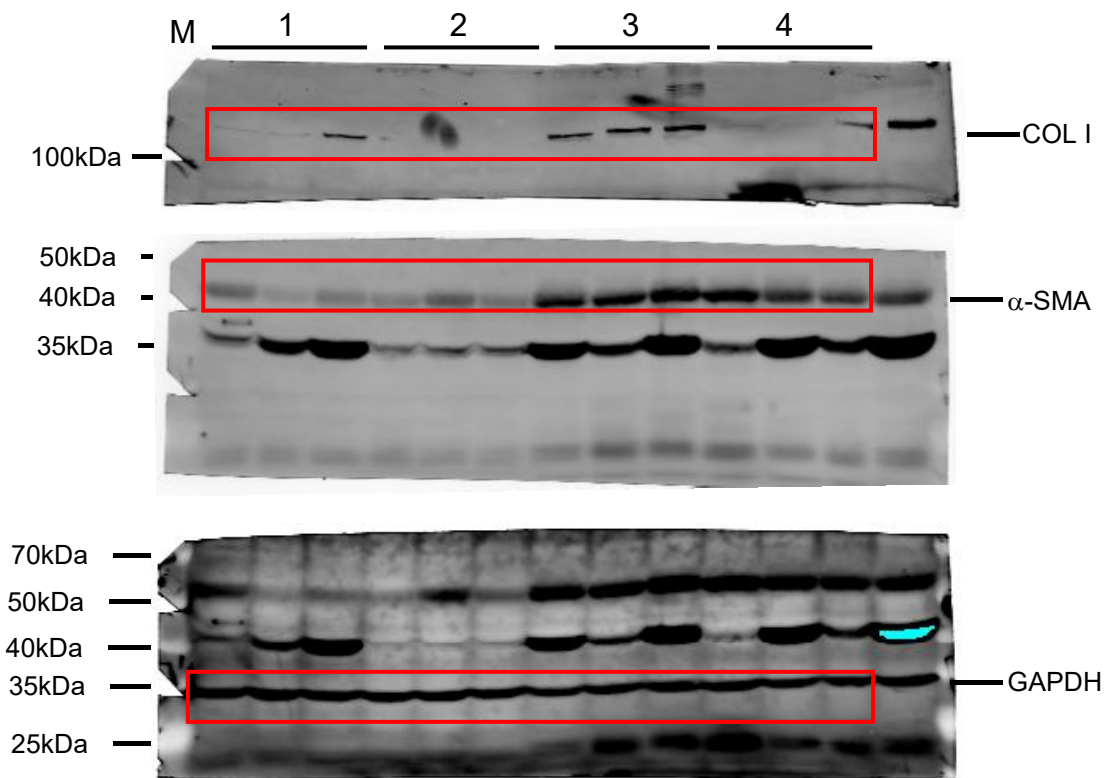

- 1: Sham + Nc siRNA-GeRPs
- 2: Sham + *Mikl* siRNA-GeRPs
- 3: BDL+ Nc siRNA-GeRPs
- 4: BDL + *Mikl* siRNA-GeRPs

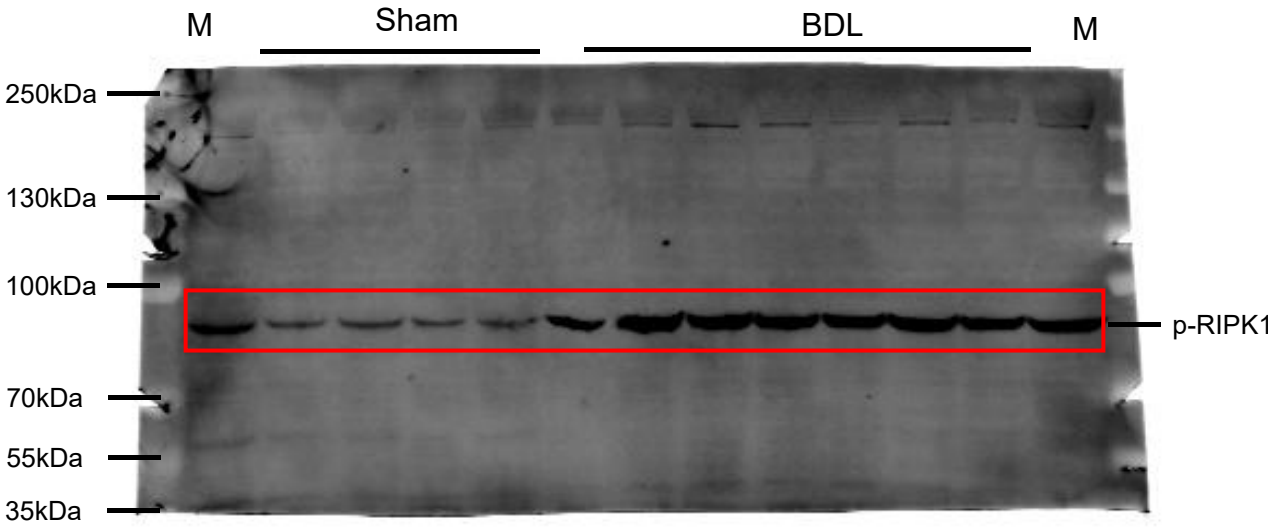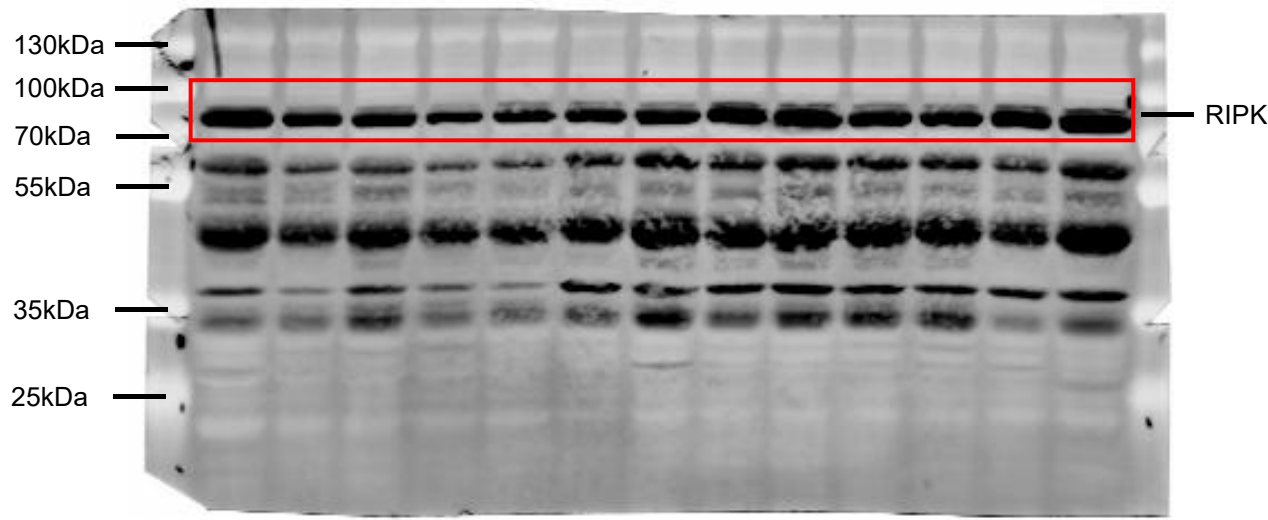

Supplementary Fig. 1B

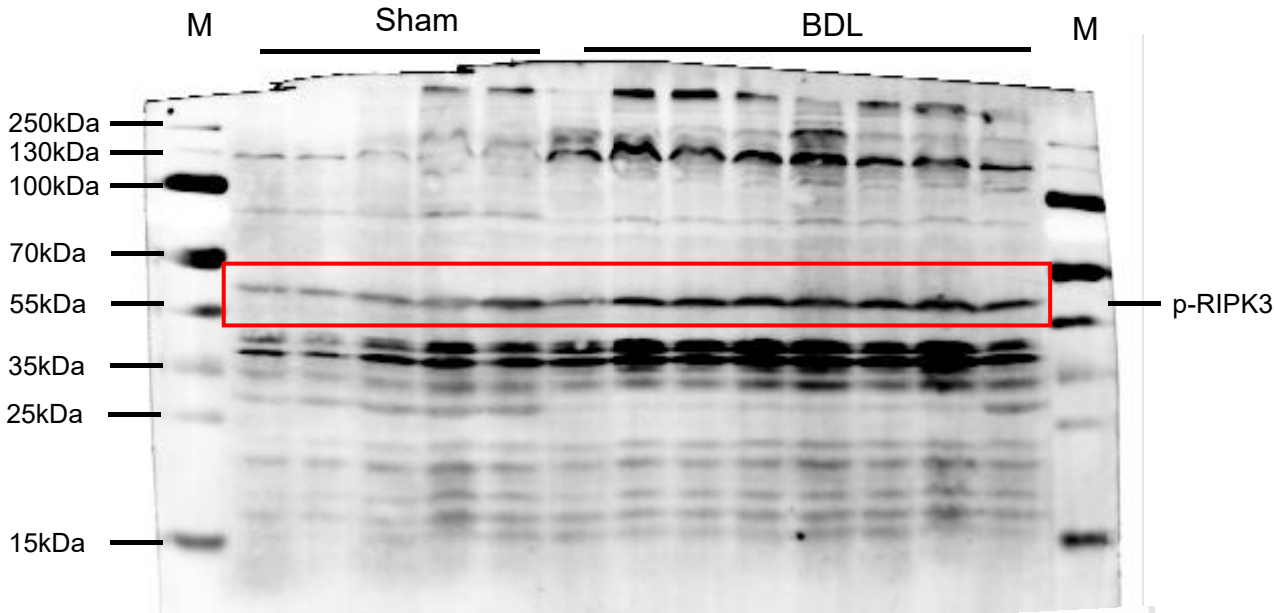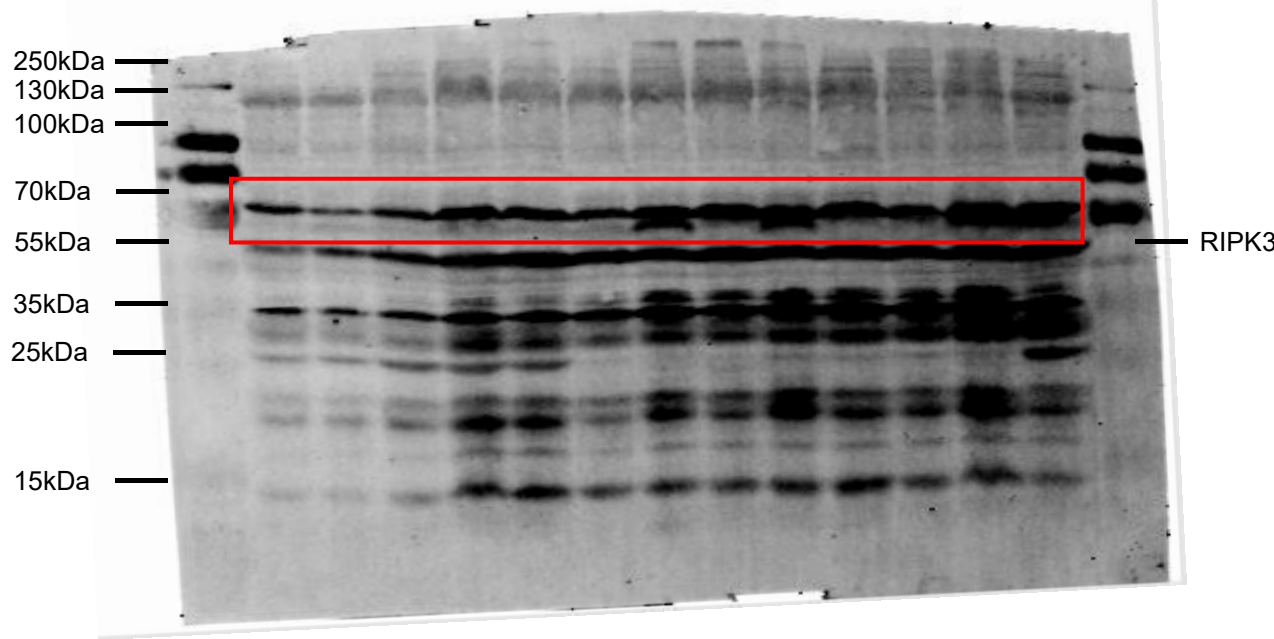

Supplementary Fig. 1B

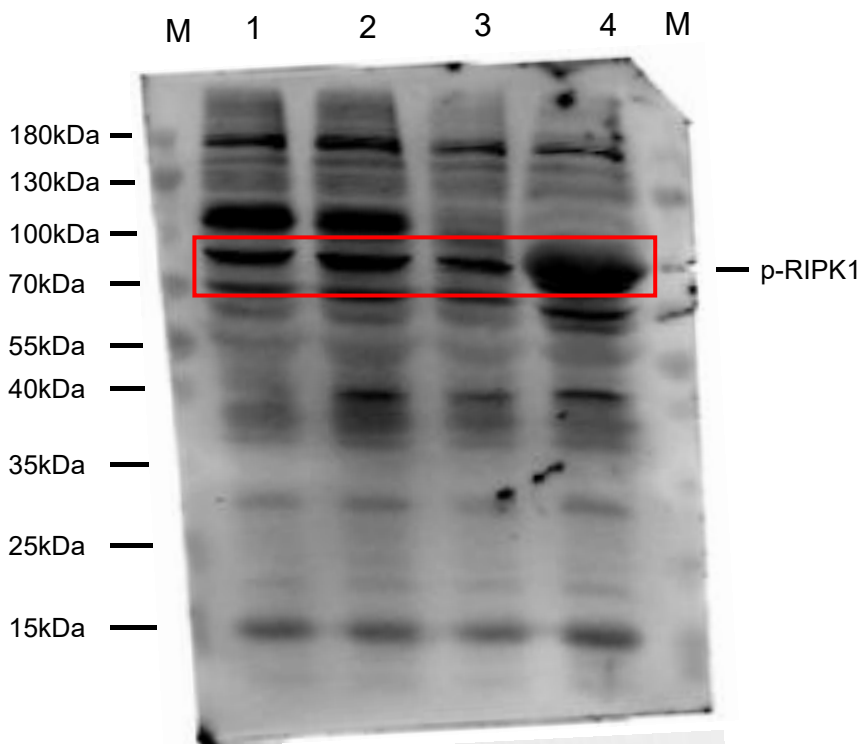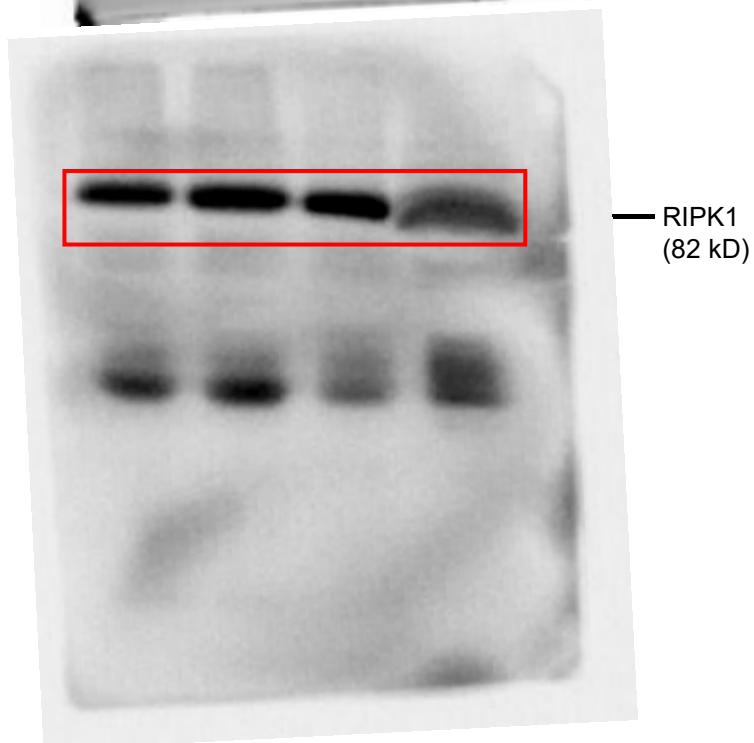

- 1: Control-treated BMDMs
- 2: 100  $\mu\text{mol/L}$  GDCA-treated BMDMs
- 3: TSZ-treated BMDMs
- 4: TSZ and 100  $\mu\text{mol/L}$  GDCA-treated BMDMs

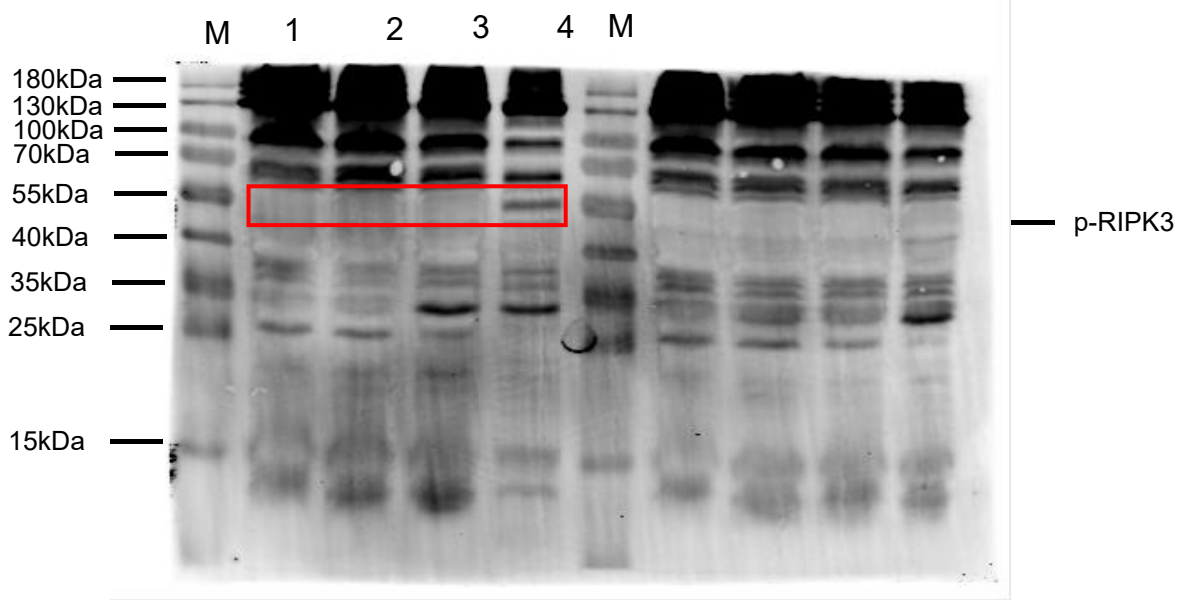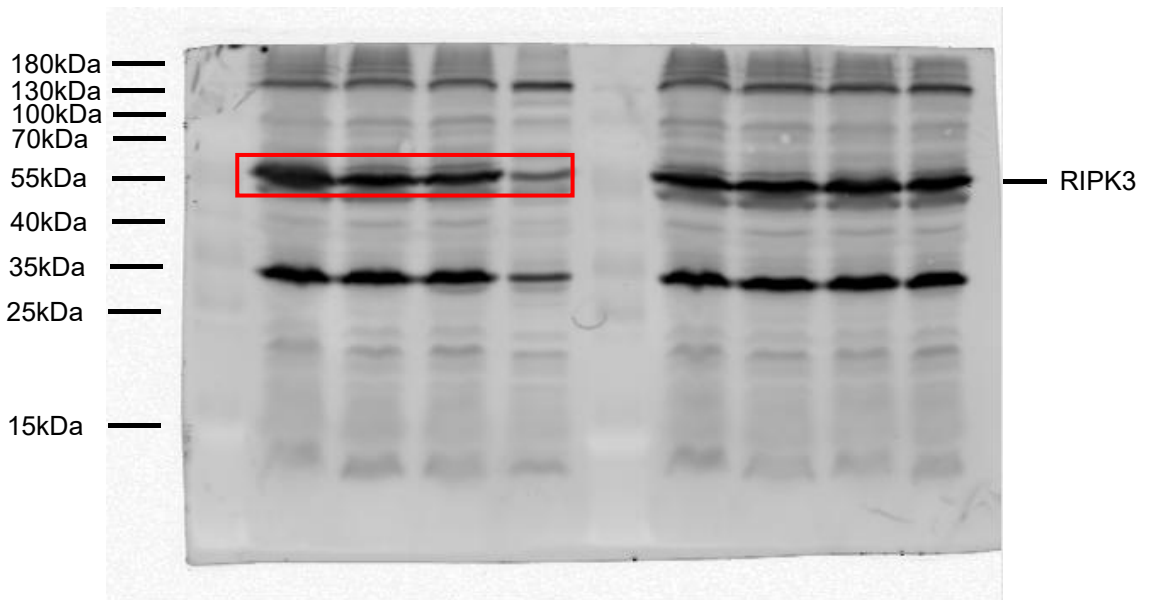

- 1: Control-treated BMDMs
- 2: 100  $\mu\text{mol/L}$  GDCA-treated BMDMs
- 3: TSZ-treated BMDMs
- 4: TSZ and 100  $\mu\text{mol/L}$  GDCA-treated BMDMs

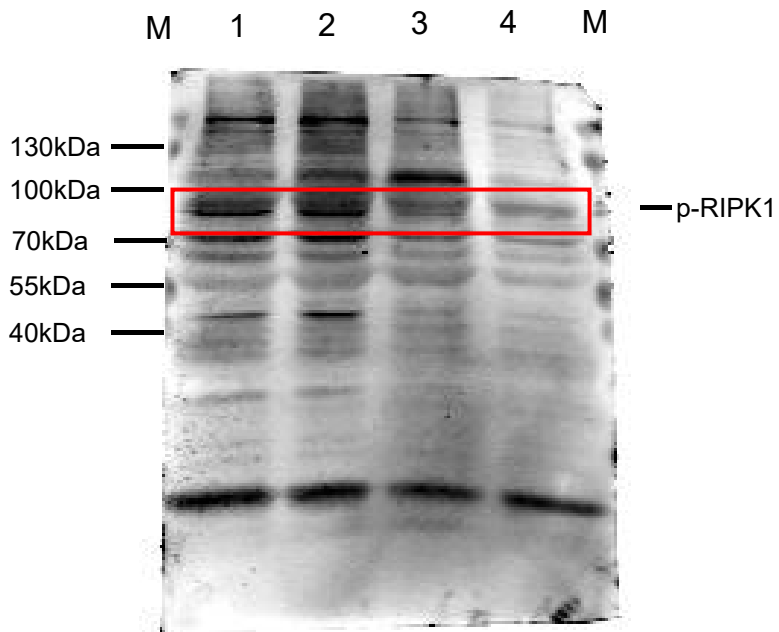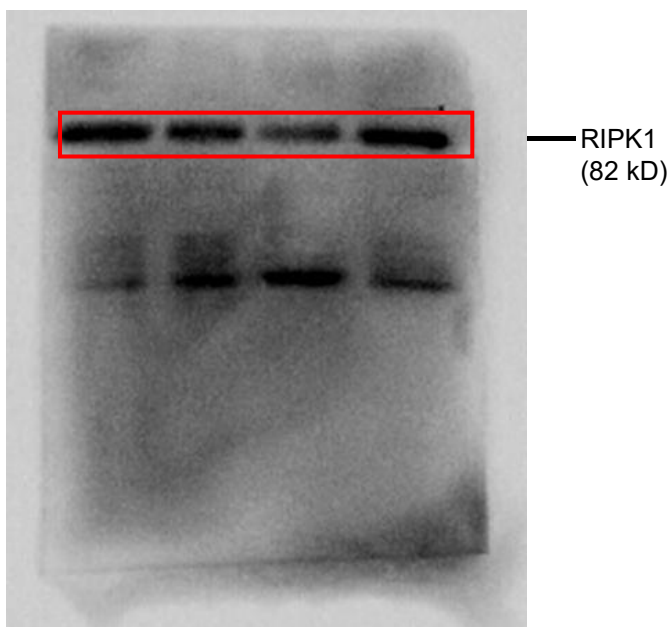

- 1: siNC-treated BMDMs
- 2: siNC, TSZ, and 100  $\mu\text{mol/L}$  GDCA-treated BMDMs
- 3: siZBP1-treated BMDMs
- 4: siZBP1, TSZ, and 100  $\mu\text{mol/L}$  GDCA-treated BMDMs

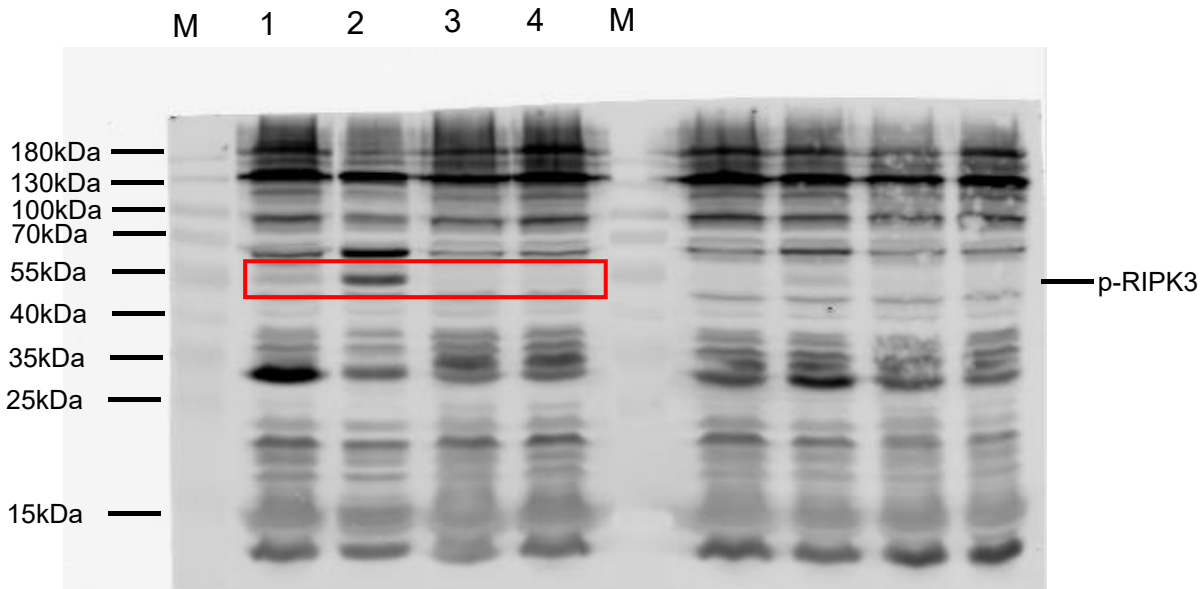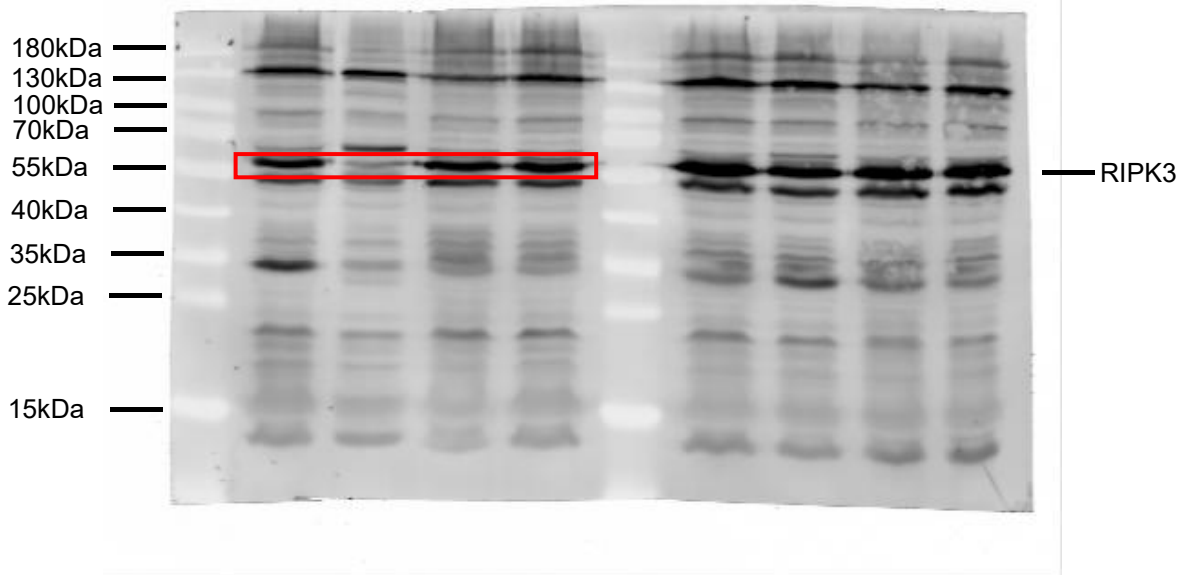

- 1: siNC-treated BMDMs
- 2: siNC, TSZ, and 100  $\mu\text{mol/L}$  GDCA-treated BMDMs
- 3: siZBP1-treated BMDMs
- 4: siZBP1, TSZ, and 100  $\mu\text{mol/L}$  GDCA-treated BMDMs



M

siNC siZBP1

M

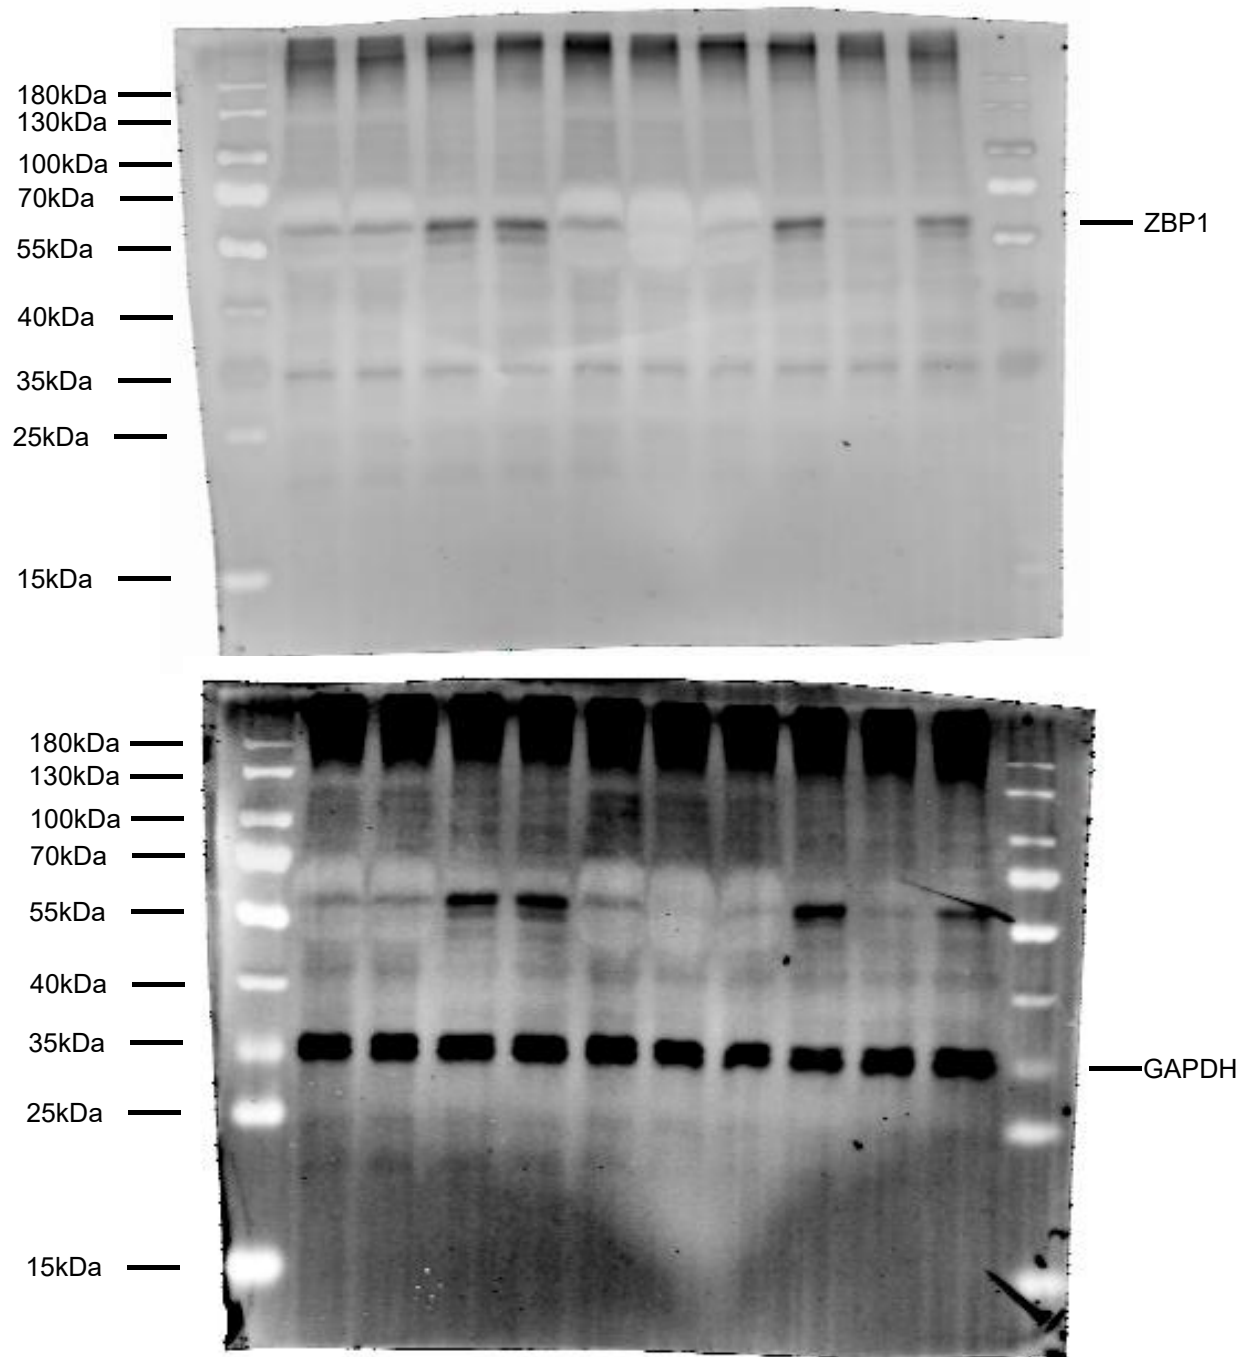

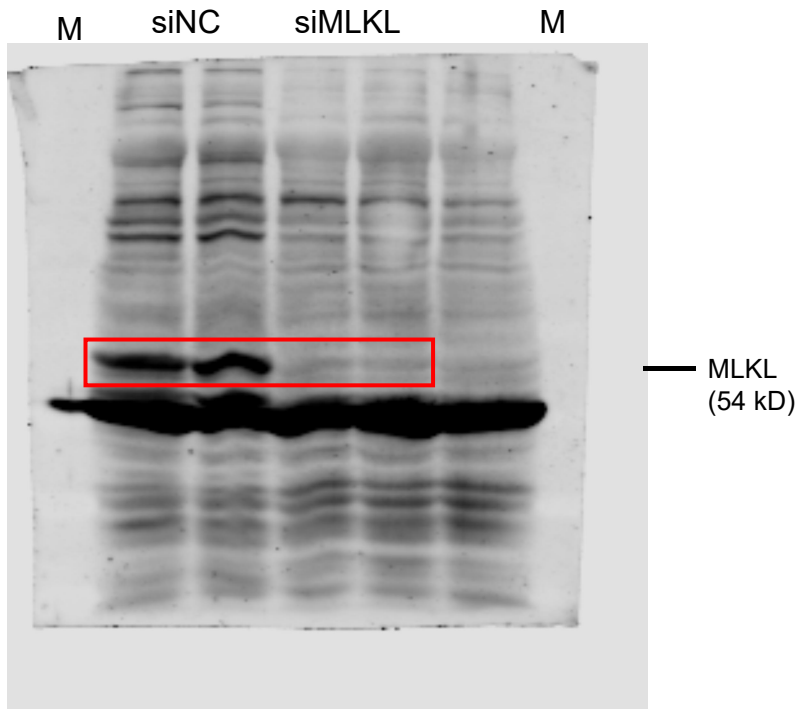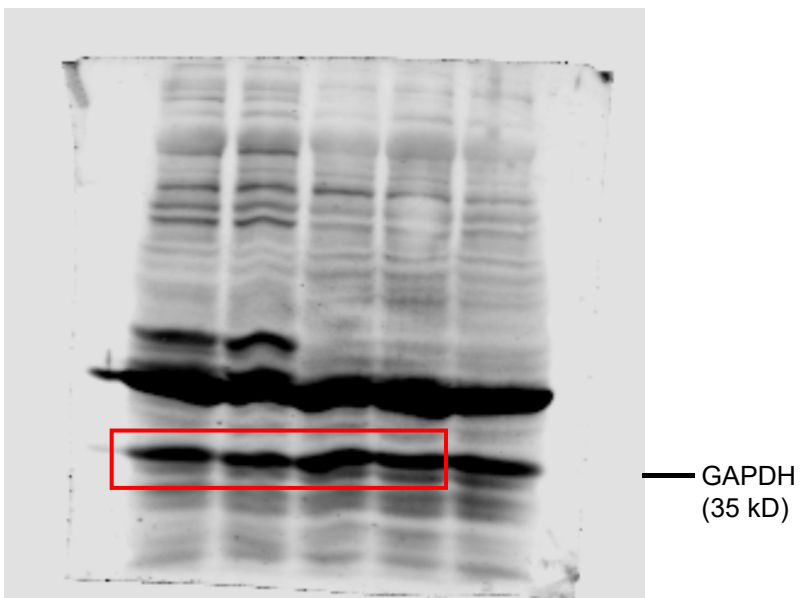

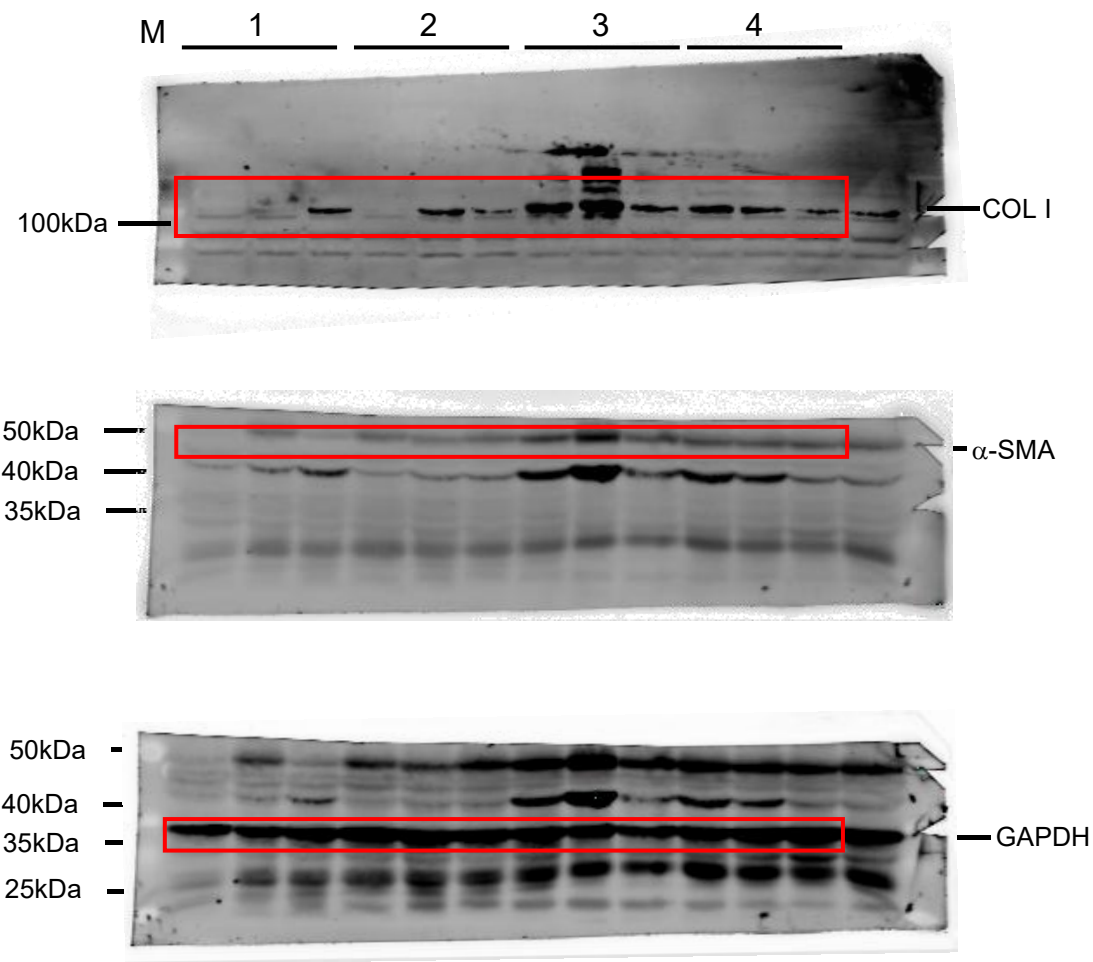

- 1: Sham + Vehicle
- 2: Sham + NSA
- 3: BDL + Vehicle
- 4: BDL + NSA

Supplementary Fig. 3E
